1

2 **An investigation of *Burkholderia cepacia* complex methylomes via SMRT**  
3 **sequencing and mutant analysis**

4

5 Short title: *Burkholderia cepacia* complex epigenetics

6

7 Olga Mannweiler<sup>1</sup>, Marta Pinto-Carbó<sup>1</sup>, Martina Lardi<sup>1</sup>, Kirsty Agnoli<sup>1¶\*</sup> and Leo Eberl<sup>1¶\*</sup>

8 <sup>1</sup>Department of Microbiology, Institute of Plant and Microbial Biology, University of Zürich.

9

10

11

12 \* Corresponding authors

13 E-mail: [k.agnoli@botinst.uzh.ch](mailto:k.agnoli@botinst.uzh.ch), [leberl@botinst.uzh.ch](mailto:leberl@botinst.uzh.ch),

14 ¶ These authors contributed equally to this work.

## 15 **Abstract**

16 The *Burkholderia cepacia* complex (Bcc) is a group of 22 closely related opportunistic pathogens which  
17 produce a wide range of bioactive secondary metabolites with great biotechnological potential, for  
18 example in biocontrol and bioremediation.

19 This study aimed to investigate methylation in the Bcc by SMRT sequencing, and to determine the  
20 impact of restriction-methylation (RM) systems on genome protection and stability and on phenotypic  
21 traits. We constructed and analysed a mutant lacking all RM components in the clinical isolate *B.*  
22 *cenocepacia* H111. We show that a previously identified essential gene of strain H111, *gp51*, encoding  
23 a methylase within a prophage region, is required for maintaining the bacteriophage in a lysogenic  
24 state. We speculate that epigenetic modification of a phage promoter provides a mechanism for a  
25 constant, low level of phage production within the bacterial population. We also found that, in addition  
26 to bacteriophage induction, methylation was important in biofilm formation, cell shape, motility,  
27 siderophore production and membrane vesicle production. Moreover, we found that DNA methylation  
28 had a massive effect on the maintenance of the smallest replicon present in this bacterium, which is  
29 essential for its virulence.

30 *In silico* investigation revealed the presence of two core RM systems, present throughout the Bcc and  
31 beyond, suggesting that the acquisition of these RM systems occurred prior to the phylogenetic  
32 separation of the Bcc. We used SMRT sequencing of single mutants to experimentally assign the *B.*  
33 *cenocepacia* H111 methylases to their cognate motifs. Analysis of the distribution of methylation  
34 patterns suggested roles for m6A methylation in replication, since motifs recognised by the core Type  
35 III RM system were more abundant at the replication origins of the three H111 replicons, and in regions  
36 encoding functions related to cell motility and iron uptake.

## 37 **Author summary**

38 While nucleotide sequence determines an organism's proteins, methylation of the nucleotides  
39 themselves can confer additional properties. In bacteria, methyltransferases methylate specific motifs  
40 to allow discrimination of 'self' from 'non-self' DNA, e.g. from bacteriophages. Restriction enzymes  
41 detect 'non-self' methylation patterns and cut foreign DNA. Furthermore, methylation of promoter  
42 regions can influence gene expression and hence affect phenotype. In this study, we determined the  
43 methylated motifs of four strains from the *Burkholderia cepacia* complex of opportunistic pathogens.  
44 Three novel motifs were found, and two that were previously identified in a related species. We  
45 deleted the genes encoding the restriction and modification components in a representative strain  
46 from among the four sequenced. In this study, methylation is shown to affect various phenotypes,

47 among which maintenance of the lysogenic state of a phage and segregational stability of the smallest  
48 megareplicon are most remarkable.

49

## 50 **Introduction**

51 The genus *Burkholderia* is metabolically and ecologically very diverse and consists of bacteria that are  
52 able to adapt to and thrive in a wide range of environments, including soil, water, the rhizosphere of  
53 plants, in fungi, as well as in association with human and animal hosts (Suarez-Moreno et al., 2012;  
54 Coenye et al., 2003). The genus *Burkholderia* was recently divided into two major clades, the  
55 *Burkholderia sensu stricto*, containing the Bcc, the *pseudomallei* group and the plant pathogenic  
56 species *Burkholderia plantarii*, *Burkholderia glumae* and *Burkholderia gladioli*, and the newly  
57 introduced genera *Paraburkholderia*, *Caballeronia* and *Robbsia* [1, 2]. These novel genera are usually  
58 referred to as *Burkholderia sensu lato* (*Burkholderia* in the broad sense).

59 The ability of the *Burkholderia* to thrive in highly varied niches is attributed to their unusually large  
60 multireplicon genomes, with sizes ranging from 6.2 to 11.5 Mbp [3, 4]. All *Burkholderia sensu stricto*  
61 species harbour a primary replicon (chromosome 1, C1) encoding genes with essential housekeeping  
62 cellular functions, such as DNA replication, cell division and gene transcription, and a secondary  
63 chromosome (chromosome 2, C2), which also carries essential genes. Genes encoded on C2 are less  
64 conserved throughout the *Burkholderia*, but are important for niche adaptation [5]. In addition,  
65 *Burkholderia* members often carry further highly variable accessory replicons with unique metabolic  
66 capabilities. Within the genus *Burkholderia sensu stricto* is a group of closely related bacteria known  
67 as the *Burkholderia cepacia* complex (Bcc). The Bcc was originally considered to have three  
68 chromosomes, but more recent work has succeeded in curing the third chromosome from all Bcc  
69 members in which this was attempted, showing that this replicon is a megaplasmid, rather than a true  
70 chromosome. Although this replicon, pC3, does not contain essential genes, its maintenance is  
71 important, and is encouraged by various means, such as toxin-antitoxin (TA) systems [6].

72 Since pC3 is the most variable replicon among Bcc members, and specifies traits such as antifungal  
73 activity and in some strains pathogenicity, we thought to use a 'replicon shuffling' approach to match  
74 the most appropriate pC3 to a 'chassis' strain for given applications, to give a plant-beneficial, anti-  
75 fungal strain with negligible pathogenicity. Once a Bcc member has been cured of pC3, it is possible to  
76 replace it with another pC3 from a different Bcc member into which an origin for conjugal transfer has  
77 been inserted. This had been achieved amongst a small number of *B. cenocepacia* strains, and between  
78 some *B. cenocepacia* strains and *B. lata* 383. However, all other such transfers attempted between Bcc  
79 species were unsuccessful [7]. This stimulated us to investigate potential causes for our difficulties in

80 effecting pC3 transfer, and of these causes, the one we considered most important was defence  
81 against incoming foreign DNA by restriction modification (RM) systems.

82 RM systems utilize DNA methylation as a means of discriminating an organism's own genome from  
83 invading DNA, for example incoming viral or plasmid DNA. Bacteria use methyltransferases to  
84 methylate their own genomes, while corresponding restriction endonucleases cleave differently  
85 methylated or unmethylated (incoming) DNA [8, 9]. Four different types of RM system have been  
86 described based on their subunit composition, cofactor requirements, sequence recognition and  
87 cleavage position, known as Types I-IV [10]. In addition to the basic function of RM systems in genome  
88 defence, methylation of bacterial genomic DNA is known to have important roles in chromosome  
89 replication, DNA mismatch repair and DNA-protein interaction, as well as in the establishment of  
90 different cell phenotypes through phase variation. Epigenetic phase variation is a reversible process  
91 by which changes in methylation of the DNA result in the silencing or expression of genes [11-14]. Even  
92 though both adenine (m6A) and cytosine (m4C and m5C) methylations are present in bacteria, the  
93 methylation of adenine bases has been suggested to have greater impact on bacterial gene regulation,  
94 whereas cytosine modification has greater impact in higher eukaryotes [11].

95 DNA methyltransferases have been mostly described as part of RM systems. However, solitary or  
96 'orphan' methyltransferases (lacking a cognate restriction enzyme) have been identified in several  
97 bacterial species, where they serve various functions. In *E. coli*, deoxyadenosine methylases (Dam)  
98 have been found to regulate several important cellular processes like DNA replication, DNA repair and  
99 regulation of gene expression [15-17]. Another orphan methyltransferase, CcrM, which was originally  
100 identified in *Caulobacter crescentus*, is widely distributed among the *Alphaproteobacteria*. This  
101 methylase contributes to the cell cycle control of DNA replication and is essential for *Caulobacter*  
102 viability [18, 19]. So far little is known about the impact of DNA methylation on cellular processes in  
103 members of the genus *Burkholderia*.

104 Recent advances in DNA sequencing technology, such as single-molecular, real-time (SMRT)  
105 sequencing, have provided new opportunities to detect and analyse the frequency and distribution of  
106 methylated bases [20, 21]. Here, we used SMRT technology to detect motifs and modifications in  
107 several Bcc members, as well as to investigate methylation patterns in *B. cenocepacia* strain H111. We  
108 also deleted the genes encoding putative H111 RM systems to allow us to draw conclusions on the role  
109 of RM systems in gene regulation and their impact on bacterial phenotypes.

## 110 **Results**

111 ***In silico* comparisons reveal the presence of two core RM systems present throughout the**  
112 ***Burkholderia cepacia* complex**

113 To identify putative RM systems present in our model strain *B. cenocepacia* H111, REBASE, a  
114 comprehensive database for DNA restriction and modification curated by NEB was used  
115 (<http://REBASE.neb.com/REBASE/REBASE.html>). Inspection of REBASE showed that seven putative RM  
116 system loci are present on chromosomes 1 and 2 (two RM system loci, 3 orphan methylase-encoding  
117 loci and 2 restriction endonuclease loci, see Fig 1), while none was identified on megaplasmid pC3 (Fig  
118 1).

119 We next compared the RM loci of H111 to those of all other *Burkholderia sensu latu* members entered  
120 in REBASE. This comparison revealed that homologues of one H111 RM system (the C1 encoded Type  
121 I system) and two orphan methylases (the TII orphan methylase on *c2* and *gp10*) were present in  
122 numerous strains within the *Burkholderia sensu latu* genomes, while the remaining five RM  
123 components present in H111 were very rare. Upon inspection of the strains bearing each RM  
124 component, it was apparent that the orphan TII methylase on H111 *c2* was present in the majority of  
125 *Burkholderia sensu lato* strains, while the H111 TIII RM system was broadly present across the Bcc and  
126 the *pseudomallei* group (Fig S1). The prevalence of these RM components in the Bcc led us to consider  
127 them as 'core' RM components in this complex. These two methylases were previously identified in  
128 the *B. pseudomallei* 982 genome, and predictions had been made for their recognition motifs [22]. In  
129 order to look for any phylogenetic relationship between the *Burkholderia sensu lato* and the RM  
130 components homologous to those present in H111, one representative strain was taken from each  
131 species present in REBASE, in addition to two commonly studied *B. cenocepacia* strains (J2315 and  
132 HI2424), to allow investigation of the diversity of RM components within the species. Since many more  
133 strains had been sequenced from the pathogenic *Burkholderia sensu stricto* than the other members,  
134 limiting the genomes considered to one per species also reduced bias. As previously mentioned, two  
135 additional strains from the species *B. cenocepacia* were included. This allowed a glimpse of within-  
136 species differences in RM components. Using representative strains allowed us to consider the entire  
137 genome of each representative strain, rather than the amino acid sequences of the RM components  
138 identified by REBASE, removing a potential source of error. tBLASTN was used to find homologues of  
139 the H111 RM components. These are illustrated as a heat-map in Fig 2, next to a phylogenetic tree of  
140 the strains, generated from their concatenated *gyrB* and *rpoD* genes. This analysis highlighted the  
141 homology of the TIII RM system (TIIRE and TIIM on Fig2) within the *Burkholderia sensu stricto* (the Bcc,  
142 the *pseudomallei* group, and *Burkholderia gladioli*, *Burkholderia plantarii* and *Burkholderia glumae*). A  
143 homologue of the orphan TII methylase (TIIMc2) was found in each of the *Burkholderia sensu lato*  
144 representatives, and also within the *Ralstonia pickettii* outgroup, demonstrating the presence of this  
145 methylase in the broader *Burkholderiales* order. The phage-encoded *gp10* methylase gene was  
146 present within bacteriophage insertions in multiple *Burkholderia sensu lato* species, in a pattern  
147 consistent with acquisition by phage transduction. Interestingly, no close homologue of the H111 *gp51*

148 methylase gene, which is part of the same bacteriophage (phage H111-1), was found. The Type IV RE  
149 encoded on C1 (TIVRc1) and the TI RM system (TIRM) were specific to *B. cenocepacia* H111, and the  
150 remaining TIV RE (TIVRc2) was found in only two other strains.

151

## 152 **Verification of predicted sequence recognition motifs and identification of further motifs**

153 To allow us to identify and compare genomic methylation patterns, the methylomes of *B. cenocepacia*  
154 H111, *B. lata* 383, *B. ambifaria* AMMD and *B. multivorans* ATCC 17616 were sequenced using Single  
155 Molecular, Real-Time (SMRT) sequencing. Various base modifications can be identified through SMRT  
156 sequencing due to their specific kinetic signatures, allowing epigenetic studies in different organisms  
157 [23].

158 Our sequencing data confirmed that the two motifs predicted to be methylated in H111 were indeed  
159 methylated (CACAG and GTWWAC), and also found methylated motifs for *B. ambifaria* AMMD and *B.*  
160 *multivorans* ATCC 17616, for which no motif predictions had yet been made (Table S1). Furthermore,  
161 we identified an asymmetric bi-partite motif in *B. cenocepacia* H111 (5'-CAG-NNNNN-TTYG-3') of the  
162 type methylated by Type I RM systems [24, 25], of which one was annotated by REBASE, on H111 C1.  
163 A Type I motif was also revealed in our *B. multivorans* ATCC 17616 genome sequence. No such Type I  
164 RM system was annotated in the publicly available ATCC 17616 genome by REBASE, however  
165 inspection of our sequencing data revealed a gene homologous to Type I methylases present in *B.*  
166 *multivorans* D2095 and D2214, which is likely to be responsible for methylating the 5'-CCA-NNNNN-  
167 RTTC-3' motif.

168 In addition to the core motifs, we identified another palindromic motif, of the type recognised by II  
169 RM systems, in *B. ambifaria* AMMD (RGATCY). [26, 27]. Two such systems are encoded in the AMMD  
170 genome. The *B. lata* genome was only methylated at the core motifs, consistent with REBASE  
171 predictions which had identified only two methyltransferases in the *B. lata* genome, both close  
172 homologues of the H111 core methyltransferases.

173

## 174 **Analysis of H111 methylation patterns suggests importance in cell replication and motility, and iron** 175 **uptake**

176 In *B. cenocepacia* H111, 60,867 modifications were detected, of which 14,585 were adenine base  
177 modifications (m6A) and 2,804 were cytosines (m4C). A total of 14,347 of the detected 14,585 (98%)  
178 adenine modifications were assigned to a specific motif, whereas no specific motifs could be identified

179 for the modified m4C bases detected (Fig 3, Fig S2). In addition to m6A and m4C modifications, 43,478  
180 'modified bases' were detected, that showed signatures consistent with some form of modification,  
181 but to which the PacBio SMRT Portal could not assign a precise type of modification (Fig 3, Fig S2).  
182 These unspecific 'modified bases' could represent methylated bases, or alternatively they could result  
183 from DNA damage due to stress prior to or during DNA extraction and purification. Such damage also  
184 results in modified bases, such as 8-oxoguanine and 8-oxoadenine.

185 To allow us to analyse the H111 methylome as a whole for patterns and hotspots, we divided each  
186 replicon's sequence into 10,000 bp windows, and the abundance of modifications was calculated (Fig  
187 3). We found that m6A and m4C modifications (Fig 3, Fig S2), as well as the uncharacterized 'modified  
188 bases' were mostly evenly distributed. However, some windows contained an increased number of  
189 motifs. Most noticeable was an increase in m6A methylations at the origin of replication of each  
190 replicon (Fig 3). These modifications were mainly at CACAG motifs, the motif recognised by one of the  
191 core RM systems (Type III RM) identified within the *Burkholderia*. To further analyse the CACAG core  
192 RM motif, we evaluated the windows in which this motif occurred most frequently (Table S2). In these  
193 hypermethylated windows we observed an abundance of genes that code for proteins involved in cell  
194 replication, e.g. cell division protein FtsK (I35\_0834, *ftsK*), DNA-directed RNA polymerase (I35\_3258),  
195 topoisomerase (I35\_2384, *parE*), chromosome partitioning proteins ParA and ParB (I35\_4003,  
196 I35\_4004), replication protein (I35\_4005) and chromosome segregation ATPases (I35\_4006), to name  
197 but some. In other hypermethylated windows we observed genes involved in bacterial cell motility and  
198 genes coding for transcriptional regulators, transporters, SAM-dependent methylases and proteins  
199 involved in iron uptake and utilisation (Table S2).

200 Windows in which the motif CAG(N)6TTYG/ CRAA(N)6CTG (recognized by the Type I RM system) was  
201 overrepresented were also scrutinised. Interestingly, this motif was more abundant in a number of  
202 genes associated with DNA replication, such as those encoding DNA ligase (I35\_2022, *ligA*), DNA gyrase  
203 subunit A (I35\_0906, *gyrA*) and chromosome partitioning protein Smc (I35\_2024, on C1 and pC3).  
204 Furthermore, we found genes coding for DNA repair systems (*recCBD*) and other genes associated with  
205 DNA repair, such as those encoding the exonuclease family protein YhaO (I35\_7871) and an ATPase  
206 (I35\_2468). Moreover, we observed genes involved in cell motility, such as those encoding MotA,  
207 flagellar motor proteins and secretion systems associated with Flp pilus formation where the  
208 occurrence of the CAG(N)6TTYG/ CRAA(N)6CTG motifs was increased. In addition, genes encoding  
209 transcriptional regulators, permeases, ABC transporters, proteins involved in cell shape and cell wall  
210 biosynthesis, as well as other membrane proteins, were found in the windows containing a higher than  
211 average frequency of methylated CAG(N)6TTYG/ CRAA(N)6CTG motifs (Table S2).



212 The GTWWAC motif was predicted to be recognized by a Type II orphan methylase (one of the core  
213 methylases), located within the highly conserved *trp* cluster on chromosome 2. The abundance of this  
214 motif was 3.5 to 4-fold lower compared to that of the CACAG motif (the other core motif). The majority  
215 of the GTWWAC motifs within the genome were located in regions containing genes coding for  
216 transporters, DNA binding proteins and proteins involved in cell motility.

217

### 218 **Construction of an RM null mutant of *B. cenocepacia* H111**

219 To allow investigation of the impact of *B. cenocepacia* H111 RM systems on phenotype, gene  
220 expression and genome protection and maintenance, we performed sequential deletions of the seven  
221 RM-encoding loci of H111 (two RM system loci, 3 orphan methylase-encoding loci and 2 restriction  
222 endonuclease loci, see Fig 1) using an I-SceI-dependent, markerless gene deletion approach [28]. The  
223 sequential nature of this deletion strategy resulted in the construction of a series of intermediate  
224 mutants in addition to the final RM null mutant, and two additional single RM mutants were also  
225 constructed (Table S3). After four rounds of site-directed mutagenesis, it became apparent that the  
226 Type II methylase encoded by the prophage III *gp51* gene was essential, in full agreement with our  
227 recent mapping of essential genes required for growth of *B. cenocepacia* H111 [29]. For further  
228 analysis, we constructed a conditional mutant (strain CM51), in which *gp51* expression was controlled  
229 by a rhamnose-inducible promoter (Table S3). This mutant could only grow in the presence of  
230 rhamnose, demonstrating that *gp51* is an essential gene (Fig S3). Serendipitously, however, a  
231 spontaneous mutant arose which had lost prophage III from its genome, and with it the *gp10* Type II  
232 methylase gene and the essential *gp51* Type II methylase gene. This demonstrated that *gp51* was only  
233 essential as part of the prophage II region, probably for the maintenance of the phage in a lysogenic  
234 state. The remaining methylase gene (*I35\_2582*) was deleted by a fifth round of site-directed  
235 mutagenesis, resulting in an RM null mutant of *B. cenocepacia* H111. During phenotypic and sequence  
236 analysis of this mutant, it was determined that the ~ 1 Mb megaplasmid pC3 had been lost. A mobilized  
237 pC3 was therefore introduced into the null mutant using previously developed techniques [30], to give  
238 strain NullpC3<sup>+</sup>. As a control strain for the phenotypic analysis of NullpC3<sup>+</sup>, an analogous version of  
239 strain H111 was constructed, which will be referred to as H111pC3<sup>+</sup>.

240 A further RM null mutant was constructed later, by repeating the final two rounds of mutagenesis, and  
241 ensuring that pC3 had been retained at each stage. This unmarked RM null mutant was named newNull  
242 and was not used for the majority of the analyses documented here, since no selection could be  
243 applied to ensure pC3 maintenance. It should be noted that newNull was examined using the majority  
244 of the phenotypic tests used on NullpC3<sup>+</sup>, and gave similar results.



245 **Verification of loss of methylation in an RM null mutant, and of the methylase cognate to each**  
246 **recognition motif**

247 We used SMRT sequencing to assign the methylated motifs present in the H111 genome to their  
248 cognate RM systems. Three methylated motifs were detected in the H111 genome. The genomes of  
249 single mutants in the Type I RM on C1 (I35\_3254), the Type II methylase on C2 (I35\_2582), and the  
250 Type III RM system on C1 (I35\_1825) were subjected to SMRT sequencing, allowing the predicted  
251 motifs 5'-CAG-NNNNN-TTYG-3', GTWWAC and CACAG to be confirmed for these methylases,  
252 respectively.

253 The genome of the RM null mutant was also subjected to SMRT sequencing, to verify loss of all  
254 methylated motifs by mapping the data from the RM null mutant against the obtained methylome  
255 data of the H111 wildtype. No m6A or m4C modifications were detected in the RM null mutant.  
256 However, 179,975 bases (~4-fold higher than in the wild type, in which 43,478 modified bases could  
257 not be assigned) were listed as having unassigned modifications by SMRT portal analysis (Fig S2, panel  
258 B). While the detected modifications could result from base methylation, it is likely that this represents  
259 an increased occurrence of damage to the DNA. SMRT sequencing also verified the complete and clean  
260 loss of phage region III from C1, and the loss of pC3.

261

262 **Transcriptional profiling by RNAseq shows effects of RM systems on expression of genes involved in**  
263 **cell motility, iron uptake and genome integrity.**

264 As mentioned previously, examination of the hypermethylated windows within the H111 genome had  
265 made apparent an increased methylation in and around genes involved in cell division and shape, in  
266 chromosome segregation, in DNA repair and in iron uptake and cell motility. In order to examine  
267 whether this increase in methylation led to transcriptional and phenotypic effects, and to determine  
268 other such effects influenced by methylation, RNAseq and phenotypic analyses were carried out on  
269 the H111 RM null mutant, NullpC3<sup>+</sup>, versus its control strain H111pC3<sup>+</sup>.

270 The unique reads obtained by RNAseq for each replicate of strains NullpC3<sup>+</sup> and H111pC3<sup>+</sup> were  
271 compared, and the top 500 genes showing the most significant changes in their expression (p-value ≤  
272 0.01 and absolute log<sub>2</sub> (Fold change) ≥ 0.5) were taken for further analysis. Of these, 240 were up- and  
273 260 down-regulated in the null mutant compared to the H111 control (Table S4). As expected, the 61  
274 genes of the lost prophage region III, as well as the deleted RM system genes, were among the 260  
275 genes showing decreased expression in the null mutant.

276 Several genes involved in cell motility were notable in the top 500 most differentially expressed genes.  
277 These were *fliI*, *flgD*, *fliL*, *motB\_2*, *motA\_1* and I35\_1589, encoding the putative fimbriae usher protein

278 StfC, and were less transcribed in the null mutant compared to H111. Also notable was *murA*, which  
279 codes for a cell wall hydrolase which plays a role in cell wall formation and cell separation. Another  
280 notable gene that showed decreased expression (-0.69 Log<sub>2</sub> fold change) in the RM null mutant was  
281 *trpB*. This gene is part of the tryptophan cluster and is located upstream of the core Type II methylase  
282 gene, which was deleted in the construction of the RM null mutant.

283 Several genes involved in replication, recombination and repair, especially in the SOS response, such  
284 as the repressor-encoding gene *lexA*, as well as *recA* and *I35\_2899*, the latter of which encodes the  
285 putative RecA/RadA recombinase, and the genes *I35\_2143* and *I35\_2898* coding for the DNA  
286 polymerase IV and a homologue of DNA polymerase-like protein PA0670 from *Pseudomonas*  
287 *aeruginosa* [31], involved in mutagenesis were found to be upregulated in the null mutant compared  
288 to H111. Other genes important for DNA replication and recombination (*I35\_1669*, coding for a  
289 homolog of eukaryotic DNA ligase III and *dnaE\_2*, encoding a DNA polymerase III alpha subunit), as  
290 well as DNA repair (*I35\_7256*, coding for an exonuclease subunit A, part of the UvrABC DNA repair  
291 system, which catalyses the recognition and processing of DNA lesions) also showed an increase in  
292 transcription in the null mutant compared to H111 [32]. In addition, we observed higher read counts  
293 of several genes coding for assembly proteins of the two remaining prophages in the null mutant (Table  
294 S4). Phage expression in *B. thailandensis* has been shown to be linked to the SOS response [33].  
295 Further, we observed upregulation of genes involved in lipid transport and metabolism (e.g.: *pcaI*, *pcaJ*,  
296 *I35\_1898*, encoding a putative 3-ketoacyl-CoA thiolase and *I35\_2250*, encoding a putative Acyl-CoA  
297 dehydrogenase family protein). Moreover, genes known to be involved in secondary metabolite  
298 biosynthesis, transport and metabolism, especially in pyochelin biosynthesis and utilization (e.g.: *pchB*,  
299 *pchE*, *pchR*, *ftpA*, *ftpB*) were upregulated in the RM null mutant compared to H111. Genes responsible  
300 for inorganic ion transport and metabolism (*katB*, encoding catalase/ peroxidase and *I35\_1307*,  
301 putatively coding for cytochrome C peroxidase) also showed up-regulation in the mutant (Table S4).

302

### 303 **Phenotypic analysis of the RM mutant**

304 To further investigate the importance of RM components for the characteristics suggested by genomic  
305 methylation patterns and transcriptomic analysis (cell replication, cell morphology, DNA repair, cell  
306 motility, iron uptake and maintenance of lysogeny), and in other possible traits, phenotypic assays  
307 were carried out. As a basis for these assays, growth in liquid culture of H111pC3<sup>+</sup> and NullpC3<sup>+</sup> was  
308 examined spectrophotometrically and found to be comparable (Fig S4).

309 Introduction of megaplasmid pC3 into the RM system null mutant was 24-fold more efficient than into  
310 wild type

311 Given that the accepted main purpose of RM systems is to limit the intrusion of foreign DNA into the  
312 genome [34], we tested the RM null mutant for efficiency of replicon introduction by conjugation. As  
313 previously mentioned, the third replicon of the Bcc, pC3, can be moved between certain Bcc members,  
314 after the integration of an origin for conjugal transfer into pC3 [7]. Transfer efficiency was determined  
315 using *B. cenocepacia* K56-2 as the donor, and either the original RM null mutant (NullΔpC3) or H111Δc3  
316 [5] as recipient. A 24-fold higher transfer efficiency rate was observed into the RM system null mutant  
317 compared to the H111 wild type, confirming that RM systems play an important role in protecting the  
318 genome against incoming DNA (Fig 4, panel A). In view of our initial hopes of establishing a protocol  
319 for replicon shuffling within the *Burkholderia* genus, and given the increase in efficiency of conjugal  
320 uptake by NullΔpC3, transfer of pC3 from *B. vietnamiensis* LMG 10929 and *B. ambifaria* AMMD into  
321 NullΔpC3 was also attempted. This, however, remained unsuccessful.

322

### 323 **A decrease in pC3 stability in the RM null mutant confirms the importance of RM systems in genome** 324 **integrity**

325 To determine the frequency of pC3 loss, a modified version of an experiment previously described in  
326 [6] was carried out. The RM system null mutant and H111 control strain were modified to allow positive  
327 selection of cells that had lost pC3. To achieve this, the trimethoprim (Tp) resistance gene (*dhfrII*) was  
328 placed under the regulation of a modified and tightly controlled lac promotor, and integrated onto C1.  
329 The gene coding for the Lac repressor and a gentamycin resistance marker (for selection) were inserted  
330 into pC3. As a result, cells bearing pC3 were Tp sensitive, due to repression of *dhfrII* by the Lac  
331 repressor. This repression was relieved upon loss of pC3, resulting in colony growth on medium  
332 supplemented with Tp. Loss of pC3 in the RM system null mutant strain was 173-fold higher compared  
333 to the H111 control strain, demonstrating that RM systems do indeed play a central role in replicon  
334 maintenance (Fig 5, panel A).

335 This decrease in pC3 stability in the RM null mutant strain was also observed phenotypically. The loss  
336 of pC3 from H111 alters the phenotype on NYG plates, as a result of reduced EPS production [5]. Loss  
337 of pC3 in the RM null mutant occurred so frequently it could be observed through the formation of  
338 wedge-shaped areas with a more transparent appearance (Fig 5, panels B and C). This phenotypic  
339 change occurs due to the location of the *shvR* regulator gene on pC3, which is known to influence  
340 colony morphology [35]. When sampled and analysed for the presence of pC3 by PCR, the absence of  
341 pC3 from the more transparent wedges was confirmed.

342

343

344 **Loss of RM systems leads to filamentous cell growth**

345 Observation of the RM null mutant (NullpC3<sup>+</sup>) and the analogous H111 control strain by fluorescence  
346 microscopy revealed that the RM null strain formed cell filaments, while the H111 control did not (Fig  
347 4, panel B). A filamentous phenotype can occur due to the replication arrest caused by the SOS  
348 response [36].

349

350 **RM systems influence cell motility, biofilm formation and proteolytic activity**

351 As suggested by the observed methylation patterns and our RNAseq data, we observed a reduction in  
352 swimming and swarming motility in the RM system null mutant compared to the control strain (Fig 4,  
353 panel C). We investigated other phenotypes known to be associated with the RpoN sigma factor, since  
354 this was found to be less expressed in the RM null mutant by our RNA-seq analysis. The presence of  
355 RpoN is known to repress multiple phenotypes, including the production and secretion of extracellular  
356 proteases, EPS, and biofilm formation [37-39]. Interestingly, we saw an increase in protease activity in  
357 the null mutant compared to H111 (Fig 4, panel D). There was no difference in EPS production between  
358 the two strains (Fig S4), however biofilm formation was significantly decreased in the RM null mutant  
359 (Fig 4, Panel E).

360

361 **RM systems are not involved in oxidative, heat, membrane damage or osmotic stress tolerance, or**  
362 **in antifungal activity**

363 Tests of the RM null mutant vs the H111 control strain for persistence under oxidative, osmotic,  
364 membrane damage and heat stresses showed no significant difference between the two strains (Fig  
365 S5). Tests for antifungal activity and pathogenicity against wax moth larvae likewise showed no  
366 differences (Fig S5 panel E).

367

368 **Deletion of RM systems leads to an increase in phage and membrane vesicle production**

369 Transmission electron microscopy (TEM) was used to investigate the presence of phages and phage-  
370 like structures in the supernatants of H111 wild type and the clean RM system null mutant, which our  
371 RNAseq analysis suggested was increased in the RM null mutant. In the electron micrographs, we  
372 observed the presence of phages and phage tails, either from partially assembled phages or tailocins  
373 (bacteriocins) (Fig 6). Furthermore, we discovered long fibres indicating flagella, and other tube-like  
374 structures of unknown function. We also observed membrane vesicles of varying sizes. To compare

375 vesicle production between the wild type and the null strain, membrane vesicles were collected and  
376 quantified by staining with FM 1-43 fluorescent dye, which binds the cell membrane. We observed a  
377 2.2-fold increase in MV production in the RM null mutant compared to the H111 wild type (Fig 6 panel  
378 C), probably as a result of phage-triggered cell lysis (Turnbull et al., 2016).

379

### 380 **Chemical and phenotypic assays for pyochelin production support methylation pattern observations** 381 **and RNAseq results**

382 Genes involved in the biosynthesis and utilization of the siderophore pyochelin showed a  
383 transcriptional increase in the RM system null mutant compared to H111 (Table S4). This was  
384 investigated phenotypically using CAS plates, in which iron bound to CAS dye can be scavenged by  
385 siderophores, resulting in a clearer halo around the colony tested. There was no clear difference in  
386 halo size between the RM null mutant and the H111 control strain (result not shown), perhaps because  
387 overall siderophore production was similar between the strains as a result of a decrease in expression  
388 of the ornibactin genes *orbK* and *orbE* observed in our RNAseq analysis. We grew strains NullpC3<sup>+</sup> and  
389 H111pC3<sup>+</sup> in an iron limited medium and extracted the siderophores produced. The extracted  
390 siderophores were separated by thin layer chromatography (TLC) and visualised by dipping the plate  
391 into an FeCl<sub>3</sub> solution. This gave rise to brown bands, indicating the location of iron chelators on the  
392 TLC plate. The bands observed for the RM null mutant sample were clearly darker than for the H111  
393 control strain, suggesting that this strain produced more pyochelin than the control. LC-MS was used  
394 to identify the pyochelin fraction, and the relative amount of pyochelin was approximated at around  
395 two-fold higher in the RM null strain by determination of the area under the LC-MS curves (Fig 7).

396

## 397 **Discussion**

398 DNA methylation is important for various bacterial cell functions, including host defence, genome  
399 integrity and regulation of cellular processes [18, 40]. In this study, we aimed to investigate the  
400 methylome of *B. cenocepacia* H111, to allow us to identify specific methylation patterns as well as to  
401 study the effects of epigenetics on a broad range of biological processes. We identified a core RM  
402 system (*I35\_1826*, *I35\_1825*) and a core orphan methylase (*I35\_2582*) via *in silico* analysis, and found  
403 during *in silico* analysis that the former was conserved throughout the *Burkholderia sensu stricto*, while  
404 the latter was present throughout the entire *Burkholderia sensu lato* and beyond, suggesting the  
405 acquisition of these components occurred before phylogenetic separation of these clades, and  
406 implying their importance since there appears to be strong selective pressure for their maintenance.  
407 It should be noted that the core Type II methyltransferase is part of the region of C2 containing the

408 majority of this replicon's essential genes (BCAM0911 to BCAM0995 in *B. cenocepacia* J2315,  
409 I35\_2579-I35\_2673 in H111). It has been speculated that the movement of this cluster from the  
410 primary chromosome, where it is found in the closely related genus *Ralstonia*, to a plasmid might have  
411 been a key occurrence in the separation of the genera *Burkholderia* and *Ralstonia* [29].

412 We also found that three RM systems are present on H111 C1 that are very specific to this strain. Close  
413 homologues (defined for our purposes as having a percentage identity of at least 80 %) of the  
414 methylase of the Type I RM system were found in six strains in addition to H111, while close  
415 homologues of the Type IV endonucleases encoded on C1 and C2 were present in one and six  
416 additional strains respectively. This suggests that when we talk of RM systems preventing the  
417 successful transfer of 'foreign' DNA, even highly related strains are included.

418 To investigate the distribution of methylated bases, we made use of single-molecular, real-time (SMRT)  
419 sequencing technology, to reveal the extent of methylation within the genomes of four Bcc members,  
420 each from separate species. Our sequencing data confirmed the two core methylated motifs predicted  
421 by REBASE (CACAG and GTWWAC), in the strains sequenced. In addition to the core motifs, further  
422 motifs were found in three of the four sequenced strains, while *B. lata* 383 showed only the core  
423 methylated motifs, consistent with REBASE predictions. The methylated motifs identified in *B.*  
424 *cenocepacia* H111 were later experimentally assigned to their cognate methylases by SMRT  
425 sequencing of single mutants.

426 We observed that the methylated CACAG motif occurred more frequently in and around the origins of  
427 replication of the three H111 replicons. Studies in other *Proteobacteria* have shown that DNA  
428 methylation is important for regulation of chromosomal replication, and that m6A modification, for  
429 example of the GATC motif in *E. coli*, is densest at the origin of replication (*oriC*) [18, 41]. Furthermore,  
430 we evaluated the windows in which CACAG, recognized by the Type III methylase, and the motif  
431 CAG(N)6TTYG (recognized by the Type I methylase), were most frequent. The type of genes present in  
432 these hypermethylated windows suggested that these methylases might be particularly involved in the  
433 regulation of genes involved in DNA replication and repair, and in cell motility. This was corroborated  
434 by the increase in SOS gene transcription in the null mutant, as evidenced by RNAseq, and the decrease  
435 in motility observed phenotypically in the RM null mutant.  
436 The Type II core orphan methylase located in the highly conserved tryptophan operon of H111  
437 recognises the motif GTWWAC. We speculated that the presence of this methylase might be involved  
438 in the regulation of the *trp* genes, required for tryptophan production, indeed the RM null mutant  
439 showed a decrease in expression of the *trpB* gene in our RNAseq analysis. A single gene deletion  
440 mutant of this Type II orphan methylase (SM-OMC2) did not show significant differences in growth in  
441 the presence and absence of tryptophan. However, we did observe the increased production of a

442 brown/orange pigment, presumably melanin, when growing the mutant strain in nutrient rich IST  
443 medium. Melanin can act to quench reactive oxygen species [42, 43], and therefore its production  
444 could reflect an increase in intercellular stress. Interestingly, this methylase was found to be highly  
445 conserved throughout the *Burkholderia sensu lato*, and even beyond, suggesting that it was acquired  
446 early in evolution. While its high level of conservation might reflect selective pressure for maintenance  
447 of the methylase, it might also occur due to the previously mentioned essential nature of the region  
448 surrounding it, as the gene cluster from I35\_2579 to I35\_2673 was previously shown to contain the  
449 majority of the essential genes present on C2 [29].

450 To investigate the impact of the RM systems on the phenotypes of H111, we sequentially deleted the  
451 RM systems and components present in its genome. Attempts to delete the orphan methylase  
452 encoded by *gp51*, followed by the construction of a conditional mutant, revealed that this methylase  
453 is essential. This suggests that the encoded methylase is important in maintaining the lysogenic state  
454 of the phage, as has been previously demonstrated for the Dam methyltransferase in  
455 enterohemorrhagic *E. coli*, which carries the Shiga toxin-encoding bacteriophage 933W [44]. Gene  
456 expression can be altered by promoter methylation, which in most cases prevents expression of a  
457 gene. The briefly occurring hemi-methylation of replicons following replication can allow expression of  
458 such genes. The essential role played by *gp51* in lysogeny leads us to speculate that by linking  
459 induction with the cell cycle via methylation,  $\phi 1$  is able to ensure a constant, low level of induction by  
460 an epigenetically triggered mechanism that creates a stochastic switch.

461 Our null mutant exhibited an increased transcription of genes involved in SOS response, which triggers  
462 phage induction [33, 45]. It is interesting to note that in our *in-silico* screen for homologues of the  
463 H111 RM components within the *Burkholderia sensu lato*, we found that while homologues of *gp10*  
464 were frequently present, *gp51* was very rare. It therefore appears likely that the Gp51 methylase has  
465 the ability to confer protection from restriction endonucleases upon entering a new bacterial host [17].

466 We used transmission electron microscopy (TEM) to investigate the presence of phages and phage-  
467 like structures in the supernatants of H111 and the RM null mutant. We detected an increase in phage-  
468 like structures in null mutant supernatants, confirming the observation made in the RNAseq analysis.  
469 It should be noted that this occurred despite the loss of phage region III, which encodes  $\phi$ H111-1, the  
470 only confirmed active bacteriophage of H111. In addition, we noticed the presence of membrane  
471 vesicles (MV) of varying sizes, and upon analysis found a 2.2-fold increase in MV production in the RM  
472 system null mutant compared to the H111 wild type. Toyofuku and colleagues recently showed that  
473 an increase in prophage-encoded endolysin triggers MV formation in *P. aeruginosa* and *Bacillus subtilis*  
474 [46, 47].



475 The RM system null mutant was sequenced to verify loss of all methylated motifs. We confirmed the  
476 loss of all m6A and m4C modifications previously detected in the wild type. However, compared to the  
477 wild type strain, the abundance of unassigned modified bases was 4-fold higher in the null mutant than  
478 WT. DNA methylation slows base incorporation in SMRT sequencing, but so too does DNA damage.  
479 The increase in unassigned modifications is likely to represent increased nicks in the genome sequence  
480 due to DNA damage. Various genes involved in replication, recombination and repair, especially in the  
481 SOS response, such as *lexA*, *recA*, genes coding for DNA polymerase IV (which acts during the SOS  
482 response) and an exonuclease subunit A (part of the UvrABC DNA repair system), were found to be  
483 upregulated in the null mutant compared to H111, suggesting that the RM null mutant might be  
484 subject to a higher level of DNA damage. In *E. coli*, Dam- mutants are subject to increased transcription  
485 of the SOS regulon. This effect is thought to occur indirectly; in the absence of Dam methylase-  
486 mediated strand discrimination, the mismatch repair system (MutHLS) causes dsDNA breaks, leading  
487 to SOS regulon induction [48, 49].

488 We observed several phenotypic changes in the RM null mutant that are known to be associated with  
489 sigma factor RpoN, whose encoding gene showed reduced expression in our RNAseq analysis.  
490 Proteolytic activity and pyochelin production were both increased, consistent with other studies which  
491 have shown that an increase in RpoN leads to a reduction in these phenotypes [37, 39]. The RM null  
492 mutant was less able to form biofilms under static conditions, both in microtiter plates and at the  
493 interface between culture medium and the air (pellicle). In *B. cenocepacia* K56-2, the RpoN sigma  
494 factor is required for bacterial motility and biofilm formation [50].

495 RM system acquisition occurred early in bacterial evolution [51]. The first investigations of RM systems  
496 demonstrated their important role in defence against foreign DNA by allowing self/non-self  
497 discrimination (reviewed in [34]). Conjugative transfer experiments to move megaplasmid pC3  
498 between *B. cenocepacia* K56-2 and the RM system null mutant verified that RM systems indeed play  
499 an important role in protecting the *B. cenocepacia* H111 genome against incoming DNA, since in the  
500 absence of RM systems in the recipient such transfer increased 24-fold in efficiency.

501 The spontaneous loss of pC3 that occurred during the construction of the RM null mutant suggested  
502 to us that the deletion of RM components might have resulted in reduced genome stability. To  
503 quantitatively evaluate pC3 stability, the frequency of pC3 loss was determined using a modified  
504 version of an experiment previously described in [52]. This confirmed that RM systems and  
505 components play a central role in the maintenance of genome integrity in *B. cenocepacia* H111. The  
506 loss of pC3 occurred so frequently in the RM null mutant that separation of the modified null strain  
507 into pC3 deficient and positive strains was also observed through colony morphology. This reduction  
508 in stability explains why pC3 was spontaneously lost during the construction of the RM null mutant. In

509 *E. coli* Dam methylase mutants, the timing of chromosome replication is disturbed, resulting in varying  
510 numbers of replicons in daughter cells [53]. Since there was little effect of the deletion of RM  
511 components and systems on H111 growth, however, we conclude that the effect on the stability of the  
512 essential replicons must be slight.

513 This study aimed to shed light on the involvement of DNA methyltransferases in the regulation of  
514 important cellular processes, as well as to unravel the impact of RM systems on bacterial phenotypes.  
515 Our work has confirmed the role of methylases and RM systems in genome protection and stability  
516 and has suggested involvement in phenotypes such as biofilm formation, siderophore production,  
517 motility, and prophage induction.

518

## 519 **Materials and Methods**

### 520 **Bioinformatic analysis of RM components**

521 A file containing the amino acid sequences of all RM components, both putative and experimentally  
522 proven, logged within the REBASE database was kindly provided by REBASE. An initial analysis was  
523 carried out on all *Burkholderia* and *Paraburkholderia* members within this file (due to the strain  
524 nomenclature used within REBASE, this meant that all *Burkholderia sensu lato* strain in the database  
525 were included). The translated sequences of the H111 RM genes (*gp10*, *I35\_2397*; *gp51*, *I35\_2438*;  
526 *TIVRMc1*, *I35\_3250*; *TIRE*, *I35\_3252*; *TIM*, *I35\_3254*; *TIIRE*, *I35\_1826*; *TIIM*, *I35\_1825*; *TIIM*, *I35\_2582*;  
527 *TIVRMc2*, *I35\_1041*) were used as BlastP queries to find homologous components within the REBASE  
528 file using CLC Main Workbench v8. The percentage ID was calculated as the number of identical  
529 residues between the query and the match, as a percentage of the number of residues present in the  
530 H111 query sequence (excluding stop codon). This is shown in Fig S1.

531 A further analysis was carried out by downloading the genomes of a representative strain from each  
532 of the *Burkholderia sensu lato* species represented in REBASE. Where possible, a commonly studied  
533 type strain was chosen. Three *B. cenocepacia* strains were chosen to illustrate the diversity among  
534 some of the RM components within the species. For *Burkholderia fungorum*, no strain designation  
535 was listed in REBASE and strain ATCC BAA-463 was chosen. The same query sequences from the first  
536 analysis were used in a tBlastN search against these genome sequences. Percentage identity was  
537 calculated as described above. The phylogenetic tree was generated by concatenating the essential  
538 and highly conserved *gyrB* and *rpoD* genes from each species, aligning using CLC Main Workbench v8,  
539 trimming where less than 50 % of the sequences aligned with TrimaAl (Phylemon2), and then

540 generating a phylogenetic tree using the neighbour joining method with CLC Main Workbench v8. The  
541 genome of *Ralstonia pickettii* 12D was also included as an outgroup for the phylogenetic analysis.

542

### 543 **Bacterial strains, plasmids and media**

544 All strains, plasmids and primers used in this study are listed in Tables S3 and S5 respectively. Unless  
545 otherwise stated, strains were grown aerobically in Luria–Bertani (Lennox) broth (Difco) at 37 °C. When  
546 required, media were supplemented with antibiotics at appropriate concentrations (in  $\mu\text{g ml}^{-1}$ ) as  
547 follows: chloramphenicol, 25  $\mu\text{g ml}^{-1}$  (*E. coli*) and 50  $\mu\text{g ml}^{-1}$  (Bcc); trimethoprim, 25  $\mu\text{g ml}^{-1}$  (*E. coli*)  
548 and 50  $\mu\text{g ml}^{-1}$  (Bcc); gentamicin, 20  $\mu\text{g ml}^{-1}$  (*E. coli* and Bcc); and rifampicin, 50  $\mu\text{g ml}^{-1}$  (Bcc). M9  
549 medium containing uracil as the nitrogen source, as described previously [5], was used for  
550 differentiation between H111 and pC3 cured derivatives.

551

### 552 **Molecular techniques**

553 Chromosomal DNA isolation was performed using the Wizard Genomic DNA Purification Kit from  
554 Promega, with minor modifications to the manufacturer's protocol as follows. According to how much  
555 gDNA was required, a different amount of bacterial overnight culture was collected. After the cells  
556 were harvested by centrifugation, the pellet was resuspended in TNE buffer (10 mM Tris-HCl, 200 mM  
557 NaCl, 100 mM EDTA, pH 8) and incubated on ice for 20 to 30 min. The cell suspension was collected by  
558 centrifugation and the isolation protocol was carried out as per the manufacturer's instructions.  
559 Plasmid preparation was routinely carried out using the Qiagen miniprep kit. DNA prepared by PCR  
560 amplification or restriction digestion was purified using the Qiagen PCR purification kit. Molecular  
561 methods were carried out as described by Sambrook et al. [54]. DNA fragments were amplified using  
562 either GoTaq DNA Polymerase (Promega) for diagnostic purposes or the proofreading Phusion High-  
563 Fidelity DNA Polymerase (NEB) to amplify fragments for use in cloning.

564

### 565 **Conjugal transfer of plasmids**

566 Bacterial conjugations were used to introduce plasmids into Bcc strains, using a filter mating technique  
567 [55]. A helper strain (MC1061/pRK2013) was used to provide the *tra* genes. Conjugations were carried  
568 out on LB plates for approximately 16 h using saturated overnight cultures. *Pseudomonas* Isolation  
569 agar (PIA; Difco), supplemented with antibiotics as appropriate, was used for selection.

570

## 571 **Methylome Sequencing**

572 Genomic DNA was extracted using the Wizard Kit (Promega), as stated above, and sequenced using  
573 Single Molecular, Real-Time (SMRT) sequencing on the PacBio RS II, by the Functional Genomics Center  
574 Zürich (FGCZ, University of Zurich). The raw data was analysed using the PacBio SMRT Portal. The  
575 sequenced reads were mapped to the reference sequence to allow detection of specific methylation  
576 patterns using the 'Base Modification and Motif Analysis' protocol.

## 577 **Data availability.**

578 The genomic data is available under NCBI BioProject number PRJNA609037. The raw reads of the  
579 sequenced genomic DNA are deposited in the SRA under the following accession numbers  
580 SAMN14218599 (*B. cenocepacia* H111 wild type), SRR11195332 (*B. cenocepacia* H111 null mutant),  
581 SRR11195331 (*B. ambifaria* AMMD), SRR11195330 (*B. multivorans* ATCC 17616), SRR11195329 (*B. lata*  
582 383).

## 583 **Methylation visualisation**

584 Prior to visualization, the abundance of modifications within each 10,000 bp length of DNA (window  
585 size) was calculated using ad-hoc Python scripts. The visualization of the detected modifications per  
586 window across the chromosomes was performed using the circlize package in R within the Rstudio  
587 interface version 1.1.463 [56]. We screened the genome for the presence of motifs in and around each  
588 replicons' *oriC*, identified using the DoriC database, the oriFinder and DNAplotter ([57], [58], [59]).

589

## 590 **Verification of prophage region III loss in the RM system QM mutant**

591 To investigate whether prophage region III was absent from the QM mutant, PCR was performed using  
592 primers designed to amplify genes within prophage region III encoding endolysin (gp12, I35\_2399),  
593 holin (gp13, I35\_4480) and the tail sheath protein (gp20, I35\_2407). These genes could not be  
594 amplified from QM, but amplification was achieved from H111, and from each of the intermediate  
595 mutants leading up to QM. This suggested that phage region III had been lost in the construction of  
596 QM, and not in a previous step. We were able to amplify the genes flanking phage region III, suggesting  
597 that the phage had excised cleanly from the genome (data not shown). Clean loss of the prophage  
598 region III was later confirmed by sequence analysis of the null mutant (Fig S2, panel B).

599

## 600 **pC3 mobilization and curing**

601 The mobilization of pC3 was enabled through insertion of an *oriT* via single crossover insertion of a  
602 suicide vector bearing an *oriT* (either pSHAFT2-gabD or pSHAFT2-araJ), allowing conjugative transfer,  
603 as previously described in [30]. To delete pC3 from several BCC strains, a straightforward replicon  
604 curing approach was performed using a constructed c3 mini-replicon called pMiniC3, bearing the single  
605 copy pC3 origin of replication, as described previously [30].

606

### 607 **pC3 stability assay**

608 Assessment of pC3 stability was carried out as previously described in [52], with modifications to the  
609 protocol. Briefly, two specifically generated suicide vectors were used to construct strains to  
610 determine the pC3 stability. pEX18Gm-pMT-TpqueF carrying Tp resistance (*dhfrII*) under the regulation  
611 of a modified *lac* promoter was integrated into C1 via double homologous recombination. The gene  
612 encoding the repressor LacI was introduced into pC3 through a double crossover using pSHAFT2-  
613 nonconpJ23109-lacI-aacI. Strains were grown in IST media for 24 hour at 37 °C, and the cell count was  
614 determined by plating dilutions at intervals. Where pC3 was present in the cell, the expression of the  
615 Tp resistance gene was repressed by LacI. When pC3 was lost, Tp was expressed, resulting in colonies  
616 on IST plates containing Tp (25 µg ml<sup>-1</sup>). To test for spontaneous Tp-resistance, colonies were replica-  
617 plated on the pC3-selective medium M9ura [30] supplemented with Tp at 25 µg ml<sup>-1</sup>.

618

### 619 **Transfer efficiency test**

620 To test for pC3 transfer efficiency between Bcc members, pC3 was mobilized by integration of  
621 pSHAFT2, which carries an *oriT*, allowing conjugative transfer, and a chloramphenicol resistance  
622 marker, in the donor strains (*B. cenocepacia* K56-2, *B. ambifaria* AMMD and *B. vietnamiensis* LMG  
623 10929). The pC3 megaplasmid was cured from the recipient strains (*B. cenocepacia* H111 wild type,  
624 and RM system null mutant NullpC3<sup>+</sup>) as described by Agnoli and colleagues [30], and spontaneous  
625 rifampicin derivatives of the strains were selected by spreading 100 µl of the overnight culture on LB  
626 plates supplemented with 100 µg ml<sup>-1</sup> rifampicin. Resistant colonies were restreaked on LB plates  
627 supplemented with rifampicin. Since the donor strains do not carry the *tra* genes required for  
628 formation of the sex pilus, a helper strain was used (MC1061/pRK2013), in a triparental mating.  
629 Dilution series were plated on PIA plates supplemented with Rif to calculate the total number of  
630 recipients and ex-conjugants). Depending on the strain, either 100 µl of an undiluted suspension or a  
631 dilution was plated on PIA plates supplemented with 200 µg ml<sup>-1</sup> Cm and 50 µg ml<sup>-1</sup> Rif to calculate the  
632 total number of ex-conjugants. Transfer efficiency was defined as total number of ex-conjugants/ total  
633 number of recipients and ex-conjugants.

634

### 635 **Construction of conditional mutants**

636 Conditional mutants were generated using the vector pSC200, which upon single crossover  
637 recombination with the genome separates a target gene from its native promoter, putting it under the  
638 control of the rhamnose-inducible PrhaB promoter [60]. Primers and restriction enzymes used have  
639 been detailed in Table S5. Conditional mutants were selected on PIA plates supplemented with 0.2 %  
640 rhamnose and trimethoprim (50 µg ml<sup>-1</sup>). To test for essentiality, conditional mutants were grown  
641 overnight in LB medium supplemented with 0.2 % rhamnose. Five µl from each sample of a dilution  
642 series was spotted on PIA media supplemented with either 0.5 % glucose or rhamnose for each strain.  
643 Plates were grown for 24 hours at 37 °C.

644

### 645 **Construction of targeted unmarked gene deletions**

646 To construct markerless gene deletions, a protocol modified from that previously described by  
647 Flanagan was used [28]. Briefly, regions of homology of approximately 500 bp in size flanking the  
648 gene to be deleted were amplified using Phusion DNA Polymerase. Both fragments, as well as the  
649 vector pGPI-SceI, were digested with the chosen restriction enzymes. A tripartite ligation was  
650 performed, the plasmid transformed into electrocompetent *E. coli* SY327λpir and spread on selective  
651 LB plates. Positive clones were confirmed by colony PCR and sequence analysis using appropriate  
652 primers (see Table S5) and the plasmid introduced into *B. cenocepacia* H111 by triparental mating.  
653 Exconjugants were selected on PIA containing Tp and confirmed by PCR. A second homologous  
654 recombination was instigated by introducing vector pDAIGm-SceI into the recipient. Positive clones  
655 were selected on PIA plates containing gentamycin, verified by colony PCR and later colony purified by  
656 streaking on PIA plates without antibiotics. Primers used for the amplification and for the final deletion  
657 verification are stated in Table S5 and were designed using the H111 GenBank files (accession no.  
658 HG938370, HG938371 and HG938372).

659 The RM system null mutant was constructed by the sequential deletion of each RM region, resulting  
660 in a series of intermediate mutants, in addition to the final RM null mutant. The order of construction  
661 was as follows: 1) deletion of the 7054 bp Type I RM system (I35\_3251 - I35\_3254), encoded on C1, to  
662 give mutant TI; 2) deletion of the Type IV restriction endonuclease on C1 (I35\_3250, 963 bp), to give  
663 strain DM; 3) deletion of the Type III RM system genes on C1 encoding one of the two core RM systems  
664 (I35\_3273, I35\_3274, 5051 bp), to give TM; 4) deletion of the Type IV restriction endonuclease on C2  
665 (I35\_5374, 729 bp), to give QM. Investigation of QM showed that prophage III had been lost from the  
666 genome, leaving only the Type II methylase gene (I35\_4914) on C2. This was deleted to give NullpC3.

667 Upon discovery of the spontaneous loss of pC3 that occurred during the construction of NullpC3<sup>-</sup>, pC3  
668 was moved back into the strain, as described in [7], to give NullpC3<sup>+</sup>. Finally, an unmarked RM null  
669 mutant strain was constructed by repeating the deletion of the Type II methylase gene (*I35\_4914*) on  
670 C2 of QM, with care taken to select a pC3-containing clone. This strain was designated 'Null'. The  
671 primers and restriction enzymes used for each deletion stage are indicated in Table S5.

672

### 673 **Preparation of samples for RNAseq analysis**

674 Overnight cultures of the strains of interest were used to inoculate 50 ml LB broth with a starting OD<sub>600</sub>  
675 of 0.01 and shaken at 220 rpm under aerobic conditions at 37 °C until an OD<sub>600</sub> of 1 was reached. The  
676 culture was prepared and total RNA extraction carried out as detailed in [61]. To remove the remaining  
677 DNA, samples were treated with RQ1 RNase-Free DNase I (Promega) and purified using the RNAeasy  
678 MiniKit from QIAGEN, according to manufacturer's guidelines. RNA quality was then checked with the  
679 RNA Nano Chip (Agilent 2100 Bioanalyzer; RNA Integrity Number >8) and 150 ng of total RNA were  
680 used for cDNA library construction. The Ovation Complete Prokaryotic RNA-Seq DR Multiplex System  
681 from NuGEN (NuGEN, San Carlos, CA, USA) was used to construct a strand-specific RNA-Seq library.  
682 This system uses Insert Dependent Adaptor Cleavage (InDAC) technology to remove ribosomal RNA.  
683 The cDNA library was analysed by capillary electrophoresis using a DNA chip from Agilent (Agilent High  
684 Sensitivity D1000 Screen Tape System). The prepared libraries were sequenced with the Illumina  
685 platform (single-end, HiSeq2500 instrument), by the Functional Genomics Center Zürich (FGCZ,  
686 University of Zurich). Between 6.2 and 9.5 million unique reads were obtained and mapped to the *B.*  
687 *ceenocepacia* H111 genome using CLC Genomics Workbench v7.0 (QIAGEN CLC bio). The top 500 genes  
688 that showed the most significant changes in their expression ( $p\text{-value} \leq 0.01$  and absolute  $\log_2$  (Fold  
689 change)  $\geq 0.5$ ) were taken for further analysis, and statistical analysis was performed using the *DESeq*  
690 R-package v1.26 [62]. The RNA-seq raw data files of wild type and mutant are accessible through the  
691 GEO Series accession number GSEXXXXXX.

692

### 693 **Swarming motility assay**

694 Swarming motility was determined on nutrient broth plates containing 0.4 % agar, 0.5 % peptone and  
695 0.3 % beef extract. Overnight cultures were normalized to an OD<sub>600</sub> of 1, and 5  $\mu$ l of the bacterial  
696 culture was spotted at the centre of the plate. After 24 hours of incubation at 30 °C, plates were  
697 documented photographically.

698



699 **Swimming motility assay**

700 Swimming motility was measured on nutrient broth plates containing 0.3 % agar, 0.3 % peptone and  
701 0.3 % beef extract. The plates were inoculated by touching the agar surface with a toothpick dipped  
702 into an OD<sub>600</sub> 1 bacterial suspension and incubated for 24 hours at 30 °C.

703

704 **Colony morphology**

705 Colony morphology was observed on NYG agar plates (1.5 % agar, 0.5 % peptone, 0.3 % yeast extract,  
706 and 2.0 % (w/v) glycerol). 5 µl of an overnight bacterial culture was spotted on the plates and incubated  
707 for 3 days at 37 °C, followed by a minimum of 2 days at RT.

708

709 **Biofilm formation assay**

710 Biofilm formation was quantified in 96-well microtiter plates as described by ([63] and [64]. The Biofilm  
711 Index (BI) was calculated as followed:  $BI = OD_{570} / OD_{550} * 100$  [65].

712

713 **EPS production assay**

714 EPS production was tested on YEM agar plates (0.05 % yeast extract, 0.4 % Mannitol, 1.5 % agar).  
715 Bacteria from an overnight culture were streaked and incubated for 48 hours at 37 °C.

716

717 **Pellicle formation assay**

718 Pellicle formation was tested in NYG broth (0.5 % peptone, 0.3 % yeast extract and 2.0 % (w/v)  
719 glycerol). The media was inoculated 1:100 from a bacterial overnight culture and incubated at RT for a  
720 minimum of 5 days without shaking, in a capped tube to avoid evaporation.

721

722 **Antifungal activity assay**

723 The antifungal activity assay was performed as previously stated in [30].

724

725 **Protease activity**

726 Bacteria were assayed for proteolytic activity using the method of Safarik [66] with modifications to  
727 the protocol as described by Schmid and colleagues [67].

728

#### 729 **Heat stress test**

730 Bacterial overnight cultures were diluted to an OD<sub>600</sub> of 1, and 500 µl was used to inoculate 50 ml LB  
731 broth (preheated to 42 °C). Cultures were incubated at 42 °C with 220 rpm shaking. The optical density  
732 was noted and the CFU µl<sup>-1</sup> was monitored after 0, 3, 6 and 9 hours.

#### 733 **Osmotic sensitivity assay**

734 Resistance to osmotic stress was tested as previously stated in [52].

735

#### 736 **Resistance to oxidative/ chlorhexidine-induced stress**

737 These assays were carried out as described by Kirby and colleagues [68], with modifications as  
738 described here. Whatman antibiotic assay discs (10 mm diameter) were used to test the resistance to  
739 two types of peroxide, inorganic (hydrogen peroxide; H<sub>2</sub>O<sub>2</sub>) and organic (*tert*-butyl-hydroperoxide),  
740 and the disinfectant agent chlorhexidine (which causes membrane disruption). Strains to be tested  
741 were grown overnight and the OD<sub>600</sub> was adjusted to 1. LB plates were then inoculated in three planes  
742 using a cotton swab to give a bacterial lawn. 10 µl of 1 % *tert*-butyl-hydroperoxide, 2.5 % H<sub>2</sub>O<sub>2</sub>, or 20  
743 % chlorhexidine were dropped onto discs (3 per strain/per replicate), placed on the inoculated plates  
744 and incubated overnight at 37 °C. Documentation was carried out either photographically or by  
745 measuring the diameter of the inhibition zone.

746

#### 747 ***Galleria mellonella* pathogenicity assay**

748 *Galleria mellonella* pathogenicity assays were carried out as described previously [7], using larvae  
749 purchased from BioSystems Technology, UK. Assays were performed in triplicate and 10 larvae were  
750 used per strain and control.

751

#### 752 **Viability assay**

753 PrestoBlue™ Cell Viability Reagent is a ready-to-use reagent, providing a quantitative measure of how  
754 metabolically active cells are. The assay was performed according to the manufacturer's protocol.  
755 Samples of the cell suspension were taken at intervals over an incubation period of 24 hours and mixed

756 with the reagent in a 1:10 ratio to a volume of 100  $\mu$ l in a 96 well plate. To avoid unrepresentative  
757 results due to dye saturation, a dilution series was set up down the plate, with each well containing 10  
758  $\mu$ l reagent and 90  $\mu$ l bacterial dilution. The mix was incubated for 1 hour at 37 °C and the fluorescence  
759 (Excitation: 530/25, Emission: 590/35) was measured in an MWGt Serius HT microplate reader from  
760 BioTek Instruments GmbH. To visualize viability over time, a non-saturated dilution (0.25) was chosen  
761 and plotted on a graph. In addition, optical density (OD<sub>600</sub>) of all replicates was measured, and the cell  
762 count was determined by plating dilutions at intervals on IST plates.

763

#### 764 **Presto-blue cell viability test**

765 For the cell viability test, the chloramphenicol markers present on pC3 in strains NullpC3<sup>+</sup> and  
766 H111pC3<sup>+</sup> were used to allow selection for pC3 maintenance. Strains were grown for 24 hours, with  
767 fluorescence measurements taken every three hours. Fluorescence after 24 hours was used to perform  
768 a two-tailed t-test.

769

#### 770 **Use of fluorescence microscopy to examine cell morphology**

771 Flasks with 20 ml LB broth were inoculated in duplicate with bacterial overnight cultures of NullpC3<sup>+</sup>  
772 and H111pC3<sup>+</sup> to a starting OD<sub>600</sub> 0.01 and incubated at 37 °C with shaking. Samples were taken at time  
773 points 0, 4 and 24 hours after treatment and the plasma membrane was stained with FM 4-64 from  
774 Life Technologies (100  $\mu$ g ml<sup>-1</sup>). Cells were observed with an epifluorescence Leica DM6000 B research  
775 microscope with a 100 x magnification.

776

#### 777 **Phage visualization using transmission electron microscopy (TEM)**

778 *Burkholderia cenocepacia* H111 and the RM null mutant (newNull) was cultured in 10 ml LB medium  
779 at 37 °C overnight. After centrifugation for 10 min at 5,000 rpm the supernatant was collected and  
780 filter-sterilized using a 0.22  $\mu$ m pore size hydrophilic polyethersulfone filter (Merck Millipore,  
781 Germany). The cell-free supernatant was then ultracentrifuged at 150,000 x g for 1 hour. The pellet  
782 was resuspended in 50  $\mu$ l PBS for visual phage detection. Phages or phage-like structures were  
783 absorbed on glow-discharged Formvar-coated 300-mesh copper grids and negatively stained with 1 %  
784 uranyl acetate for visualization using the Transmission electron microscopy (TEM).

785

#### 786 **MV isolation and quantification**

787 H111 wild type and the RM null mutant, Null, were grown overnight and used to inoculate flasks  
788 containing 20 ml LB broth to a starting OD<sub>600</sub> of 0.02. Cultures were shaken for 24 hours at 37 °C. The  
789 isolation and quantification of the membrane vesicles was performed as described by Turnbull and  
790 colleagues [47]. Briefly, 10 ml of each bacterial suspension were spun for 10 min at 5,000 rpm (4472  
791 rcf) at 4 °C, the supernatant collected and filter-sterilized using a 0.22 µm filter. After the supernatants  
792 were ultracentrifuged at 150,000 x g for 1 hour, each pellet containing membrane vesicles (MV) was  
793 resuspended in 100 µL PBS buffer. For quantification, MVs were stained with the membrane-binding  
794 dye FM1-43 (Life Technologies, USA) and the fluorescence intensity (510 nm excitation/626 nm  
795 emission) was measured using a MWGt Sirius HT microplate reader from BioTek Instruments GmbH.

796

#### 797 **CAS assay**

798 CAS plates were prepared to phenotypically characterize siderophore production, as described in [69].  
799 10 µl of each overnight culture was spotted on the plate and incubated for 48 hours at 37 °C. CAS  
800 plates were then visually inspected for a halo within and around the colonies, which indicated the  
801 production of iron chelating compounds, such as pyochelins.

802

#### 803 **Pyochelin extraction and analysis**

804 Strains were grown in 100 ml iron-free succinate (IFS) medium at 37 °C for 40 – 43 hours, until the  
805 OD<sub>600</sub> was above 1. Cells were then collected by centrifugation for 20 min at 5000 rpm at 4 °C and the  
806 supernatant was sterile filtered, followed by acidification with 1 M HCl to a pH of 1.5 – 2 and extraction  
807 by adding 0.4 volumes of ethyl acetate. The upper ethyl acetate phase was then collected and vacuum  
808 dried using the Rotavapor RE (Büchi) until the amount was concentrated to about 5 ml total volume.  
809 This concentrate was then distributed into Eppendorf tubes and completely desiccated using the  
810 Eppendorf Concentrator 5301. The residue was then resuspended in 100 µl methanol and one µl of  
811 each sample analysed by thin layer chromatography (TLC) using silica gel 60 F254 (Merck Millipore,  
812 Germany) with chloroform-acetic acid-ethanol (90:5:10 [vol/vol]) as the developing solvent. The TLC  
813 plate was then quickly dipped into 100 mM FeCl<sub>3</sub> to visualize the purified pyochelins, which were  
814 visible as brown areas on the TLC plate.

815

#### 816 **Acknowledgements**

817 We are grateful to Dr. Gabriella Pessi for her help with the RNA-seq analysis and for critical review of  
818 the manuscript. Thanks to Dr. Yilei Liu for her guidance in RNA library preparation. Many thanks to Dr.  
819 Anugraha Mathew and Dr. Yi-Chi Chen for their help with the chemical analysis and to Ratchara  
820 Kalawong for helping with the transmission electron microscopy. We would like to thank Dr. Carlotta  
821 Fabbri for excellent technical assistance. Many thanks also to Dr. Dana Macelis at REBASE, who at our  
822 request compiled a file containing the amino acid sequences of all RM components listed in the  
823 database, including their respective species and strains. This is available for ftp download and is  
824 updated on a monthly basis. PacBIO SMRT sequencing and Illumina sequencing for RNA-seq was  
825 carried out by the Functional Genomics Center Zürich (FGCZ, University of Zurich).

826

827 **Financial Disclosure** This work was supported by the Swiss National Fund (Project 31003A\_122013,  
828 [www.snf.ch](http://www.snf.ch)) to LE. The funders had no role in study design, data collection and analysis, decision to  
829 publish, or preparation of the manuscript.

830

## 831 References

- 832 1. Dobritsa AP, Samadpour M. Transfer of eleven species of the genus *Burkholderia* to the genus  
833 *Paraburkholderia* and proposal of *Caballeronia* gen. nov. to accommodate twelve species of the genera  
834 *Burkholderia* and *Paraburkholderia*. *Int J Syst Evol Microbiol*. 2016;66(8):2836-46. doi: 10.1099/ijsem.0.001065.  
835 PubMed PMID: 27054671.
- 836 2. Lopes-Santos L, Castro DBA, Ferreira-Tonin M, Correa DBA, Weir BS, Park D, et al. Reassessment of the  
837 taxonomic position of *Burkholderia andropogonis* and description of *Robbsia andropogonis* gen. nov., comb. nov.  
838 Antonie Leeuwenhoek. 2017;110(6):727-36. doi: 10.1007/s10482-017-0842-6. PubMed PMID: 28190154.
- 839 3. Sousa SA, Ulrich M, Bragonzi A, Burke M, Worlitzsch D, Leitao JH, et al. Virulence of *Burkholderia cepacia*  
840 complex strains in gp91phox<sup>-/-</sup> mice. *Cell Microbiol*. 2007;9(12):2817-25. Epub 2007/07/14. doi: 10.1111/j.1462-  
841 5822.2007.00998.x. PubMed PMID: 17627623.
- 842 4. Manna M, Park I, Seo YS. Genomic Features and Insights into the Taxonomy, Virulence, and  
843 Benevolence of Plant-Associated *Burkholderia* Species. *Int J Mol Sci*. 2018;20(1). doi: 10.3390/ijms20010121.  
844 PubMed PMID: 30598000; PubMed Central PMCID: PMC6337347.
- 845 5. Agnoli K, Schwager S, Uehlinger S, Vergunst A, Viteri DF, Nguyen DT, et al. Exposing the third  
846 chromosome of *Burkholderia cepacia* complex strains as a virulence plasmid. *Mol Microbiol*. 2012;83(2):362-78.  
847 Epub 2011/12/17. doi: 10.1111/j.1365-2958.2011.07937.x. PubMed PMID: 22171913.
- 848 6. Agnoli K, Frauenknecht C, Freitag R, Schwager S, Jenul C, Vergunst A, et al. The third replicon of members  
849 of the *Burkholderia cepacia* Complex, plasmid pC3, plays a role in stress tolerance. *Appl Environ Microbiol*.  
850 2014;80(4):1340-8. Epub 2013/12/18. doi: 10.1128/AEM.03330-13. PubMed PMID: 24334662; PubMed Central  
851 PMCID: PMC3911052.
- 852 7. Agnoli K, Freitag R, Gomes MC, Jenul C, Suppiger A, Mannweiler O, et al. Use of Synthetic Hybrid Strains  
853 To Determine the Role of Replicon 3 in Virulence of the *Burkholderia cepacia* Complex. *Appl Environ Microbiol*.  
854 2017;83(13). doi: 10.1128/AEM.00461-17. PubMed PMID: 28432094.
- 855 8. Restriction-Modification Systems as Mobile Epigenetic Elements [Internet]. 2011. Available from:  
856 <https://www.ncbi.nlm.nih.gov/books/NBK63963/>.
- 857 9. Korlach J, Turner SW. Going beyond five bases in DNA sequencing. *Curr Opin Struct Biol*. 2012;22(3):251-  
858 61. doi: 10.1016/j.sbi.2012.04.002. PubMed PMID: 22575758.

- 859 10. Roberts RJ, Belfort M, Bestor T, Bhagwat AS, Bickle TA, Bitinaite J, et al. A nomenclature for restriction  
860 enzymes, DNA methyltransferases, homing endonucleases and their genes. *Nucleic Acids Res.* 2003;31(7):1805-  
861 12. doi: 10.1093/nar/gkg274. PubMed PMID: 12654995; PubMed Central PMCID: PMC152790.
- 862 11. Wion D, Casadesus J. N6-methyl-adenine: an epigenetic signal for DNA-protein interactions. *Nat Rev*  
863 *Microbiol.* 2006;4(3):183-92. doi: 10.1038/nrmicro1350. PubMed PMID: 16489347; PubMed Central PMCID:  
864 PMC2755769.
- 865 12. Polaczek P, Kwan K, Campbell JL. GATC motifs may alter the conformation of DNA depending on  
866 sequence context and N6-adenine methylation status: possible implications for DNA-protein recognition. *Mol*  
867 *Gen Genet.* 1998;258(5):488-93. PubMed PMID: 9669330.
- 868 13. Hsieh P. Molecular mechanisms of DNA mismatch repair. *Mutat Res.* 2001;486(2):71-87. PubMed PMID:  
869 11425513.
- 870 14. Waldron DE, Owen P, Dorman CJ. Competitive interaction of the OxyR DNA-binding protein and the Dam  
871 methylase at the antigen 43 gene regulatory region in *Escherichia coli*. *Mol Microbiol.* 2002;44(2):509-20.  
872 PubMed PMID: 11972787.
- 873 15. Casadesus J, Low D. Epigenetic gene regulation in the bacterial world. *Microbiol Mol Biol Rev.*  
874 2006;70(3):830-56. doi: 10.1128/MMBR.00016-06. PubMed PMID: 16959970; PubMed Central PMCID:  
875 PMC1594586.
- 876 16. Takahashi N, Naito Y, Handa N, Kobayashi I. A DNA methyltransferase can protect the genome from  
877 postdisturbance attack by a restriction-modification gene complex. *J Bacteriol.* 2002;184(22):6100-8. PubMed  
878 PMID: 12399478; PubMed Central PMCID: PMC151934.
- 879 17. Murphy J, Mahony J, Ainsworth S, Nauta A, van Sinderen D. Bacteriophage orphan DNA  
880 methyltransferases: insights from their bacterial origin, function, and occurrence. *Appl Environ Microbiol.*  
881 2013;79(24):7547-55. doi: 10.1128/AEM.02229-13. PubMed PMID: 24123737; PubMed Central PMCID:  
882 PMC3837797.
- 883 18. Reisenauer A, Kahng LS, McCollum S, Shapiro L. Bacterial DNA methylation: a cell cycle regulator? *J*  
884 *Bacteriol.* 1999;181(17):5135-9. PubMed PMID: 10464180; PubMed Central PMCID: PMC94015.
- 885 19. Zweiger G, Marczynski G, Shapiro L. A *Caulobacter* DNA methyltransferase that functions only in the  
886 predivisional cell. *J Mol Biol.* 1994;235(2):472-85. doi: 10.1006/jmbi.1994.1007. PubMed PMID: 8289276.
- 887 20. Ameer A, Kloosterman WP, Hestand MS. Single-Molecule Sequencing: Towards Clinical Applications.  
888 *Trends Biotechnol.* 2019;37(1):72-85. doi: 10.1016/j.tibtech.2018.07.013. PubMed PMID: 30115375.
- 889 21. Beaulaurier J, Schadt EE, Fang G. Deciphering bacterial epigenomes using modern sequencing  
890 technologies. *Nat Rev Genet.* 2019;20(3):157-72. doi: 10.1038/s41576-018-0081-3. PubMed PMID: 30546107;  
891 PubMed Central PMCID: PMC6555402.
- 892 22. Hong KW, Tee KK, Yin WF, Roberts RJ, Chan KG. Methylome Characterization of *Burkholderia*  
893 *pseudomallei* Strain 982 at Single-Base Resolution. *Microbiol Resour Announc.* 2019;8(43). doi:  
894 10.1128/MRA.00898-19. PubMed PMID: 31649075; PubMed Central PMCID: PMCPMC6813387.
- 895 23. Flusberg BA, Webster DR, Lee JH, Travers KJ, Olivares EC, Clark TA, et al. Direct detection of DNA  
896 methylation during single-molecule, real-time sequencing. *Nat Methods.* 2010;7(6):461-5. doi:  
897 10.1038/nmeth.1459. PubMed PMID: 20453866; PubMed Central PMCID: PMC2879396.
- 898 24. Murray NE. Type I restriction systems: sophisticated molecular machines (a legacy of Bertani and  
899 Weigle). *Microbiol Mol Biol Rev.* 2000;64(2):412-34. PubMed PMID: 10839821; PubMed Central PMCID:  
900 PMC98998.
- 901 25. Morgan RD, Luyten YA, Johnson SA, Clough EM, Clark TA, Roberts RJ. Novel m4C modification in type I  
902 restriction-modification systems. *Nucleic Acids Res.* 2016;44(19):9413-25. doi: 10.1093/nar/gkw743. PubMed  
903 PMID: 27580720; PubMed Central PMCID: PMC5100572.
- 904 26. Pingoud A, Wilson GG, Wende W. Type II restriction endonucleases--a historical perspective and more.  
905 *Nucleic Acids Res.* 2014;42(12):7489-527. doi: 10.1093/nar/gku447. PubMed PMID: 24878924; PubMed Central  
906 PMCID: PMC4081073.
- 907 27. Xu SY, Nugent RL, Kasamkattil J, Fomenkov A, Gupta Y, Aggarwal A, et al. Characterization of type II and  
908 III restriction-modification systems from *Bacillus cereus* strains ATCC 10987 and ATCC 14579. *J Bacteriol.*  
909 2012;194(1):49-60. doi: 10.1128/JB.06248-11. PubMed PMID: 22037402; PubMed Central PMCID: PMC3256598.
- 910 28. Flannagan RS, Linn T, Valvano MA. A system for the construction of targeted unmarked gene deletions  
911 in the genus *Burkholderia*. *Environmental microbiology.* 2008;10(6):1652-60. doi: 10.1111/j.1462-  
912 2920.2008.01576.x. PubMed PMID: 18341581.
- 913 29. Higgins S, Sanchez-Contreras M, Gualdi S, Pinto-Carbo M, Carlier A, Eberl L. The Essential Genome of  
914 *Burkholderia cenocepacia* H111. *J Bacteriol.* 2017;199(22). doi: 10.1128/JB.00260-17. PubMed PMID: 28847919;  
915 PubMed Central PMCID: PMCPMC5648868.



- 916 30. Agnoli K, Schwager S, Uehlinger S, Vergunst A, Viteri DF, Nguyen DT, et al. Exposing the third  
917 chromosome of *Burkholderia cepacia* complex strains as a virulence plasmid. *Molecular microbiology*.  
918 2012;83(2):362-78. doi: 10.1111/j.1365-2958.2011.07937.x. PubMed PMID: 22171913.
- 919 31. Cirz RT, O'Neill BM, Hammond JA, Head SR, Romesberg FE. Defining the *Pseudomonas aeruginosa* SOS  
920 response and its role in the global response to the antibiotic ciprofloxacin. *J Bacteriol*. 2006;188(20):7101-10.  
921 doi: 10.1128/JB.00807-06. PubMed PMID: 17015649; PubMed Central PMCID: PMC1636241.
- 922 32. Crowley DJ, Boubriak I, Berquist BR, Clark M, Richard E, Sullivan L, et al. The *uvrA*, *uvrB* and *uvrC* genes  
923 are required for repair of ultraviolet light induced DNA photoproducts in *Halobacterium* sp. NRC-1. *Saline*  
924 *systems*. 2006;2:11. doi: 10.1186/1746-1448-2-11. PubMed PMID: 16970815; PubMed Central PMCID:  
925 PMC1590041.
- 926 33. Ulrich RL, Deshazer D, Kenny TA, Ulrich MP, Moravusova A, Opperman T, et al. Characterization of the  
927 *Burkholderia thailandensis* SOS response by using whole-transcriptome shotgun sequencing. *Appl Environ*  
928 *Microbiol*. 2013;79(19):5830-43. doi: 10.1128/AEM.00538-13. PubMed PMID: 23872555; PubMed Central  
929 PMCID: PMC3811356.
- 930 34. Vasu K, Nagaraja V. Diverse functions of restriction-modification systems in addition to cellular defense.  
931 *Microbiol Mol Biol Rev*. 2013;77(1):53-72. doi: 10.1128/MMBR.00044-12. PubMed PMID: 23471617; PubMed  
932 Central PMCID: PMC3591985.
- 933 35. Subramoni S, Nguyen DT, Sokol PA. *Burkholderia cenocepacia* ShvR-regulated genes that influence  
934 colony morphology, biofilm formation, and virulence. *Infect Immun*. 2011;79(8):2984-97. Epub 2011/06/22. doi:  
935 10.1128/IAI.00170-11. PubMed PMID: 21690240; PubMed Central PMCID: PMC3147549.
- 936 36. Erill I, Campoy S, Barbe J. Aeons of distress: an evolutionary perspective on the bacterial SOS response.  
937 *FEMS Microbiol Rev*. 2007;31(6):637-56. doi: 10.1111/j.1574-6976.2007.00082.x. PubMed PMID: 17883408.
- 938 37. Shao X, Zhang X, Zhang Y, Zhu M, Yang P, Yuan J, et al. RpoN-Dependent Direct Regulation of Quorum  
939 Sensing and the Type VI Secretion System in *Pseudomonas aeruginosa* PAO1. *J Bacteriol*. 2018;200(16). doi:  
940 10.1128/JB.00205-18. PubMed PMID: 29760208; PubMed Central PMCID: PMC6060356.
- 941 38. Lloyd MG, Lundgren BR, Hall CW, Gagnon LB, Mah TF, Moffat JF, et al. Targeting the alternative sigma  
942 factor RpoN to combat virulence in *Pseudomonas aeruginosa*. *Scientific reports*. 2017;7(1):12615. doi:  
943 10.1038/s41598-017-12667-y. PubMed PMID: 28974743; PubMed Central PMCID: PMC6158711.
- 944 39. Lardi M, Aguilar C, Pedrioli A, Omasits U, Suppiger A, Carcamo-Oyarce G, et al. sigma54-Dependent  
945 Response to Nitrogen Limitation and Virulence in *Burkholderia cenocepacia* Strain H111. *Appl Environ Microbiol*.  
946 2015;81(12):4077-89. Epub 2015/04/05. doi: 10.1128/AEM.00694-15. PubMed PMID: 25841012.
- 947 40. Bower EKM, Cooper LP, Roberts GA, White JH, Luyten Y, Morgan RD, et al. A model for the evolution of  
948 prokaryotic DNA restriction-modification systems based upon the structural malleability of Type I restriction-  
949 modification enzymes. *Nucleic Acids Res*. 2018;46(17):9067-80. doi: 10.1093/nar/gky760. PubMed PMID:  
950 30165537; PubMed Central PMCID: PMC6158711.
- 951 41. Barras F, Marinus MG. The great GATC: DNA methylation in *E. coli*. *Trends Genet*. 1989;5(5):139-43.  
952 PubMed PMID: 2667217.
- 953 42. Zughaiier SM, Ryley HC, Jackson SK. A melanin pigment purified from an epidemic strain of *Burkholderia*  
954 *cepacia* attenuates monocyte respiratory burst activity by scavenging superoxide anion. *Infect Immun*.  
955 1999;67(2):908-13. PubMed PMID: 9916107; PubMed Central PMCID: PMC96403.
- 956 43. Liu GY, Nizet V. Color me bad: microbial pigments as virulence factors. *Trends Microbiol*. 2009;17(9):406-  
957 13. doi: 10.1016/j.tim.2009.06.006. PubMed PMID: 19726196; PubMed Central PMCID: PMC2743764.
- 958 44. Murphy KC, Ritchie JM, Waldor MK, Lobner-Olesen A, Marinus MG. Dam methyltransferase is required  
959 for stable lysogeny of the Shiga toxin (Stx2)-encoding bacteriophage 933W of enterohemorrhagic *Escherichia coli*  
960 O157:H7. *J Bacteriol*. 2008;190(1):438-41. doi: 10.1128/JB.01373-07. PubMed PMID: 17981979; PubMed Central  
961 PMCID: PMC2223730.
- 962 45. Balbontin R, Rowley G, Pucciarelli MG, Lopez-Garrido J, Wormstone Y, Lucchini S, et al. DNA adenine  
963 methylation regulates virulence gene expression in *Salmonella enterica* serovar Typhimurium. *J Bacteriol*.  
964 2006;188(23):8160-8. doi: 10.1128/JB.00847-06. PubMed PMID: 16997949; PubMed Central PMCID:  
965 PMC1698197.
- 966 46. Toyofuku M, Carcamo-Oyarce G, Yamamoto T, Eisenstein F, Hsiao CC, Kurosawa M, et al. Prophage-  
967 triggered membrane vesicle formation through peptidoglycan damage in *Bacillus subtilis*. *Nat Commun*.  
968 2017;8(1):481. doi: 10.1038/s41467-017-00492-w. PubMed PMID: 28883390; PubMed Central PMCID:  
969 PMC5589764.
- 970 47. Turnbull L, Toyofuku M, Hynen AL, Kurosawa M, Pessi G, Petty NK, et al. Explosive cell lysis as a  
971 mechanism for the biogenesis of bacterial membrane vesicles and biofilms. *Nat Commun*. 2016;7:11220. doi:  
972 10.1038/ncomms11220. PubMed PMID: 27075392; PubMed Central PMCID: PMC4834629.



- 973 48. Lobner-Olesen A, Marinus MG, Hansen FG. Role of SeqA and Dam in *Escherichia coli* gene expression: a  
974 global/microarray analysis. Proc Natl Acad Sci U S A. 2003;100(8):4672-7. doi: 10.1073/pnas.0538053100.  
975 PubMed PMID: 12682301; PubMed Central PMCID: PMC153614.
- 976 49. Glickman B, van den Elsen P, Radman M. Induced mutagenesis in dam- mutants of *Escherichia coli*: a  
977 role for 6-methyladenine residues in mutation avoidance. Mol Gen Genet. 1978;163(3):307-12. PubMed PMID:  
978 355857.
- 979 50. Saldias MS, Lamothe J, Wu R, Valvano MA. *Burkholderia cenocepacia* requires the RpoN sigma factor for  
980 biofilm formation and intracellular trafficking within macrophages. Infect Immun. 2008;76(3):1059-67. doi:  
981 10.1128/IAI.01167-07. PubMed PMID: 18195023; PubMed Central PMCID: PMC2258854.
- 982 51. Oliveira PH, Touchon M, Rocha EP. The interplay of restriction-modification systems with mobile genetic  
983 elements and their prokaryotic hosts. Nucleic Acids Res. 2014;42(16):10618-31. doi: 10.1093/nar/gku734.  
984 PubMed PMID: 25120263; PubMed Central PMCID: PMC4176335.
- 985 52. Agnoli K, Frauenknecht C, Freitag R, Schwager S, Jenul C, Vergunst A, et al. The third replicon of members  
986 of the *Burkholderia cepacia* Complex, plasmid pC3, plays a role in stress tolerance. Applied and environmental  
987 microbiology. 2014;80(4):1340-8. doi: 10.1128/AEM.03330-13. PubMed PMID: 24334662; PubMed Central  
988 PMCID: PMC3911052.
- 989 53. Demarre G, Chattoraj DK. DNA adenine methylation is required to replicate both *Vibrio cholerae*  
990 chromosomes once per cell cycle. PLoS Genet. 2010;6(5):e1000939. doi: 10.1371/journal.pgen.1000939.  
991 PubMed PMID: 20463886; PubMed Central PMCID: PMCPMC2865523.
- 992 54. Sambrook J. Molecular cloning : a laboratory manual: Third edition. Cold Spring Harbor, N.Y. : Cold Spring  
993 Harbor Laboratory Press, [2001] ©2001; 2001.
- 994 55. Herrero M, Delorenzo V, Timmis KN. Transposon Vectors Containing Non-Antibiotic Resistance Selection  
995 Markers for Cloning and Stable Chromosomal Insertion of Foreign Genes in Gram-Negative Bacteria. J Bacteriol.  
996 1990;172(11):6557-67. PubMed PMID: ISI:A1990EF93400049.
- 997 56. Gu Z, Gu L, Eils R, Schlesner M, Brors B. circlize Implements and enhances circular visualization in R.  
998 Bioinformatics. 2014;30(19):2811-2. doi: 10.1093/bioinformatics/btu393. PubMed PMID: 24930139.
- 999 57. Luo H, Gao F. DoriC 10.0: an updated database of replication origins in prokaryotic genomes including  
1000 chromosomes and plasmids. Nucleic Acids Res. 2019;47(D1):D74-D7. doi: 10.1093/nar/gky1014. PubMed PMID:  
1001 30364951; PubMed Central PMCID: PMC6323995.
- 1002 58. Luo H, Zhang CT, Gao F. Ori-Finder 2, an integrated tool to predict replication origins in the archaeal  
1003 genomes. Front Microbiol. 2014;5:482. doi: 10.3389/fmicb.2014.00482. PubMed PMID: 25309521; PubMed  
1004 Central PMCID: PMC4164010.
- 1005 59. Carver T, Thomson N, Bleasby A, Berriman M, Parkhill J. DNAPlotter: circular and linear interactive  
1006 genome visualization. Bioinformatics. 2009;25(1):119-20. doi: 10.1093/bioinformatics/btn578. PubMed PMID:  
1007 18990721; PubMed Central PMCID: PMC2612626.
- 1008 60. Ortega XP, Cardona ST, Brown AR, Loutet SA, Flannagan RS, Campopiano DJ, et al. A putative gene cluster  
1009 for aminoarabinose biosynthesis is essential for *Burkholderia cenocepacia* viability. Journal of bacteriology.  
1010 2007;189(9):3639-44. doi: 10.1128/JB.00153-07. PubMed PMID: 17337576; PubMed Central PMCID:  
1011 PMC1855895.
- 1012 61. Lardi M, Liu Y, Purtschert G, Bolzan de Campos S, Pessi G. Transcriptome Analysis of *Paraburkholderia*  
1013 *phymatum* under Nitrogen Starvation and during Symbiosis with *Phaseolus Vulgaris*. Genes. 2017;8(12). doi:  
1014 10.3390/genes8120389. PubMed PMID: 29244728; PubMed Central PMCID: PMC5748707.
- 1015 62. Anders S, Huber W. Differential expression analysis for sequence count data. Genome biology.  
1016 2010;11(10):R106. doi: 10.1186/gb-2010-11-10-r106. PubMed PMID: 20979621; PubMed Central PMCID:  
1017 PMC3218662.
- 1018 63. Huber B, Riedel K, Hentzer M, Heydorn A, Gotschlich A, Givskov M, et al. The cep quorum-sensing system  
1019 of *Burkholderia cepacia* H111 controls biofilm formation and swarming motility. Microbiology. 2001;147(Pt  
1020 9):2517-28. doi: 10.1099/00221287-147-9-2517. PubMed PMID: 11535791.
- 1021 64. Aguilar C, Schmid N, Lardi M, Pessi G, Eberl L. The lclR-family regulator BapR controls biofilm formation  
1022 in *B. cenocepacia* H111. PloS one. 2014;9(3):e92920. doi: 10.1371/journal.pone.0092920. PubMed PMID:  
1023 24658785; PubMed Central PMCID: PMC3962473.
- 1024 65. Savoia D, Zucca M. Clinical and environmental *Burkholderia* strains: biofilm production and intracellular  
1025 survival. Curr Microbiol. 2007;54(6):440-4. doi: 10.1007/s00284-006-0601-9. PubMed PMID: 17457645.
- 1026 66. Safarik I. Thermally modified azocasein--a new insoluble substrate for the determination of proteolytic  
1027 activity. Biotechnology and applied biochemistry. 1987;9(4):323-4. PubMed PMID: 3311076.
- 1028 67. Schmid N, Pessi G, Deng Y, Aguilar C, Carlier AL, Grunau A, et al. The AHL- and BDSF-dependent quorum  
1029 sensing systems control specific and overlapping sets of genes in *Burkholderia cenocepacia* H111. PloS one.

1030 2012;7(11):e49966. Epub 2012/11/28. doi: 10.1371/journal.pone.0049966. PubMed PMID: 23185499; PubMed  
1031 Central PMCID: PMC3502180.  
1032 68. Bauer AW, Kirby WM, Sherris JC, Turck M. Antibiotic susceptibility testing by a standardized single disk  
1033 method. American journal of clinical pathology. 1966;45(4):493-6. PubMed PMID: 5325707.  
1034 69. Schwyn B, Neilands JB. Universal chemical assay for the detection and determination of siderophores.  
1035 Anal Biochem. 1987;160:47-56. doi: 10.1016/0003-2697(87)90612-9.

## 1036 Figure Legends

1037 **Figure 1. RM systems present in the *B. cenocepacia* H111 genome.** RM – restriction and modification  
1038 system, RE – restriction endonuclease, M – methyltransferase (orphan). Recognition motifs confirmed  
1039 in this study have been shown in green. Location of prophages has also been shown.

1040 **Figure 2. Distribution of homologous of H111 RM components throughout the *Burkholderia sensu***  
1041 ***lato*.** The phylogenetic tree was generated from concatenated *gyrB* and *rpoD* genes, which are  
1042 essential and highly conserved, with the *Ralstonia pickettii* 12D genes used to give an outgroup. RM  
1043 components have been abbreviated as follows: *gp51* and *gp10*, type II phage-encoded methylases on  
1044 C1; TIVRc1, type IV endonuclease encoded on C1; TIRE and TIM make up the type I RM system encoded  
1045 on C1; TIIIRE and TIIIM, type III RM system encoded on C1; TIIMc2, Type II methylase encoded on c2;  
1046 TIVRc2, type IV endonuclease encoded on c2. The amino acid sequence of each RM gene was used to  
1047 query a BLAST database including the genomes of each strain shown. Numbers on the heatmap  
1048 represent percentage identity, calculated as the number of identical residues between the query and  
1049 the match, as a percentage of the number of residues present in the H111 query sequence (excluding  
1050 stop codon). Matches with less than 20 % identity were excluded.

1051 **Figure 3. Distribution of m6A base modifications.** Patterns in purple represent m6A modifications that  
1052 were assigned to specific motifs: inner circle motif, CAGNNNNNTTYG/CRAANNNNNCTG Type I RM  
1053 system; second circle motif, CACAG (Type III RM system); outer circle motif, GTWWAC (Type II orphan  
1054 methylase). Every hatchline in each circle is a representation of a 10,000 basepair window. The  
1055 numbers of modified bases or motifs per window is represented by the color range. The darkness of  
1056 colour corresponds to the number of modifications (maximum number of modifications found in a  
1057 window: C1, 24 modifications; C2, 28 modifications; pC3, 22 modifications). Circles were constructed  
1058 using the circlize package for R.

1059 **Figure 4. Phenotypic changes observed upon RM system loss. A.** Conjugal uptake was increased 24-  
1060 fold in the absence of RM systems. Rifampicin resistant derivatives of pC3-cured strains of NullpC3-  
1061 and H111Δc3 were used as recipients for conjugal transfer. K56-2 pC3 was mobilized by the integration  
1062 of pSHAFT2, which carries an *oriT* and a chloramphenicol resistance marker. Transfer efficiency was  
1063 calculated by dividing CFU on media containing Rifampicin + chloramphenicol (total ex-conjugants) by  
1064 CFU on media containing Rifampicin (total recipient cells). Fold-change in transfer efficiency for

1065 H111 $\Delta$ c3 and NullpC3<sup>-</sup> Rifampicin resistant recipients is shown. Error bars represent the standard  
1066 deviation (SD). **B.** Fluorescence microscopy reveals filamentous cells. Exponential phase cells were  
1067 subjected to microscopic analysis. Cells were observed with an epifluorescence Leica DM6000 B  
1068 research microscope at 100 x magnification. **C.** Cell motility is decreased in the absence of RM systems.  
1069 Representative images from triplicates datasets for swimming and swarming motility are shown. **D.**  
1070 Proteolytic activity is increased in the RM system null mutant. Bars represent the mean of three  
1071 technical replicates. Error bars represent the standard deviation (SD). The absorbance at OD<sub>442</sub> was  
1072 measured and normalized against the cell density OD<sub>600</sub>. Significance was determined using a two-  
1073 tailed t-test (p-value: 0.0047). **E.** RM systems are important for biofilm formation. Photographs  
1074 illustrate differences in pellicle formation, image shown is representative of a dataset of at least 3  
1075 replicates. Graph shows biofilm formation using the crystal violet assay. Error bars indicate SD, n=3.  
1076 Significance was determined using a two-tailed t-test (p-value: 0.0348).

1077 **Figure 5. pC3 loss was more frequent in the absence of RM systems.** **A.** To assess pC3 stability, strains  
1078 H111-tag and Null-tag, which were designed to become Tp resistant on loss of the pC3 replicon, were  
1079 grown in rich medium for 24 hours at 37 °C. Frequency of pC3 deficient cells was plotted. Error bars  
1080 indicate SD, n=3. **B.** Increased pC3 loss in the absence of RM systems was phenotypically visible on  
1081 NYG medium. **C.** Inoculum from places indicated by numbers in panel B was streaked on M9 ura  
1082 medium [5] to confirm the presence/absence of pC3. Strong growth indicates pC3 presence.

1083 **Figure 6. Membrane vesicles (MV) and phage particles were more abundant in cultures of the RM**  
1084 **null mutant.** Concentrated culture supernatants were visualised at 180,000X magnification by TEM.  
1085 White arrows indicate phage tails of the *Myoviridae* or *Siphoviridae* family. **A.** H111pC3<sup>+</sup>. **B.** RM null  
1086 mutant, NullpC3<sup>+</sup>. **C.** Membrane vesicles were more abundant in the absence of RM systems.  
1087 Concentrated supernatants from the H111 control strain (H111pC3<sup>+</sup>) and the RM null mutant,  
1088 NullpC3<sup>+</sup>, were stained with FM 1-43, to quantify membrane vesicles (MV). Error bars indicate SD, n=3.

1089 **Figure 7. The absence of RM systems results in an increase in pyochelin production.** **A.** Thin layer  
1090 chromatography performed on the RM system null mutant and H111 control suggests that pyochelin  
1091 production is increased in the null mutant. Siderophores were extracted and separated by TLC.  
1092 Chloroform-acetic acid-ethanol at 90:5:10 [vol/vol] was used as the developing solvent. Ferric chloride  
1093 was used to visualize the siderophores. LC-MC/MS confirmed the location of pyochelin and salicylic  
1094 acid on the TLC plate. LC-MC/MS carried out with  $\Delta$ ppm < 3 ppm. **B.** Estimation of pyochelin content.  
1095 Replicates marked with (b.) in panel A were used. Differences in pyochelin production were  
1096 approximately quantified by determining the area under the LC-MS curve.

1097

## 1098 **Supporting information captions**

1099 **Figure S1. Homologues of the H111 RM components** within the *Burkholderia sensu lato*. A file  
1100 containing the amino acid sequences of all RM components, both putative and experimentally proven,  
1101 logged within the REBASE database was kindly provided by REBASE. The translated sequences of the  
1102 H111 RM genes (*gp10*, *I35\_2397*; *gp51*, *I35\_2438*; TIVRMc1, *I35\_3250*; TIRE, *I35\_3252*; TIM, *I35\_3254*;  
1103 TIIIRE, *I35\_1826*; TIIIM, *I35\_1825*; TIIM, *I35\_2582*; TIVRMc2, *I35\_1041*) were used as BlastP queries to  
1104 find homologous components within the REBASE file using CLC Main Workbench v8. The percentage  
1105 ID was calculated as the number of identical residues between the query and the match, as a  
1106 percentage of the number of residues present in the H111 query sequence (excluding stop codon).

1107 **Figure S2. Distribution of modified bases in the RM null mutant.** The hatches surrounding each circle  
1108 represent 10,000 bp windows. The number of modified bases per window is represented by the depth  
1109 of colour. **A.** m4C modifications are shown in red, unassigned modified bases in grey. **B.** Distribution  
1110 of 'modified bases' in the RM null mutant. Specific modifications could not be assigned, and probably  
1111 represented DNA damage. The arrow indicates the area from which prophage region III was lost.

1112 **Figure S3. Construction of conditional knockouts with a rhamnose inducible promotor confirmed the**  
1113 **essentiality of *gp 51*.** OD<sub>600</sub> adjusted cell suspensions of conditional *gp10* and *gp 51* mutants (CM10  
1114 and CM51, respectively) were spotted on medium supplemented with 0.5 % glucose or rhamnose.  
1115 Growth was inspected after 24 hours at 37 °C.

1116 **Figure S4. Growth of H111pC3<sup>+</sup> and NullpC3<sup>+</sup> was similar.** Growth at 37 °C in LB medium was examined  
1117 by determining OD<sub>600</sub> over time.

1118 **Figure S5. Phenotypic tests showing no significant impact by RM systems.** **A.** Plate assays for tests as  
1119 labelled, from top to bottom: 1 % *tert*-butyl-hydroperoxide (organic peroxide, induces oxidative  
1120 stress), 20 % chlorhexidine (induces stress to the membrane), EPS production on TEM plates, antifungal  
1121 activity against *Rhizoctonia solanii*. **B.** Survival in medium containing 2M NaCl. **C.** Sensitivity to H<sub>2</sub>O<sub>2</sub>  
1122 (inorganic peroxide, induces oxidative stress). **D.** Survival at 42 °C. **E.** *Galleria mellonella* pathogenicity  
1123 assay. Each image is representative of at least three biological replicates. Each graph shows the mean  
1124 and SD for biological triplicates.

1125

1126

bioRxiv preprint doi: <https://doi.org/10.1101/2020.03.09.983379>; this version posted March 9, 2020. The copyright holder for this preprint (which was not certified by peer review) is the author/funder, who has granted bioRxiv a license to display the preprint in perpetuity. It is made available under aCC-BY 4.0 International license.

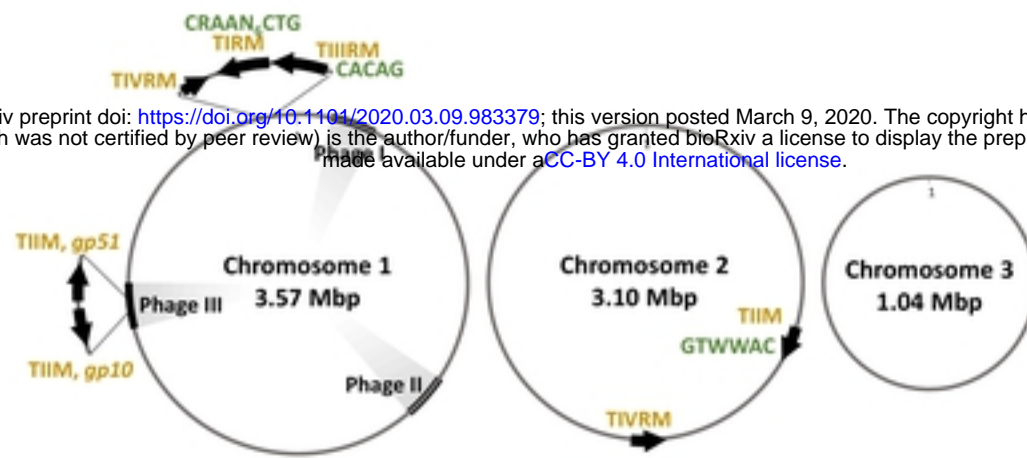

**Figure 1. RM systems present in the *B. cenocepacia* H111 genome.**



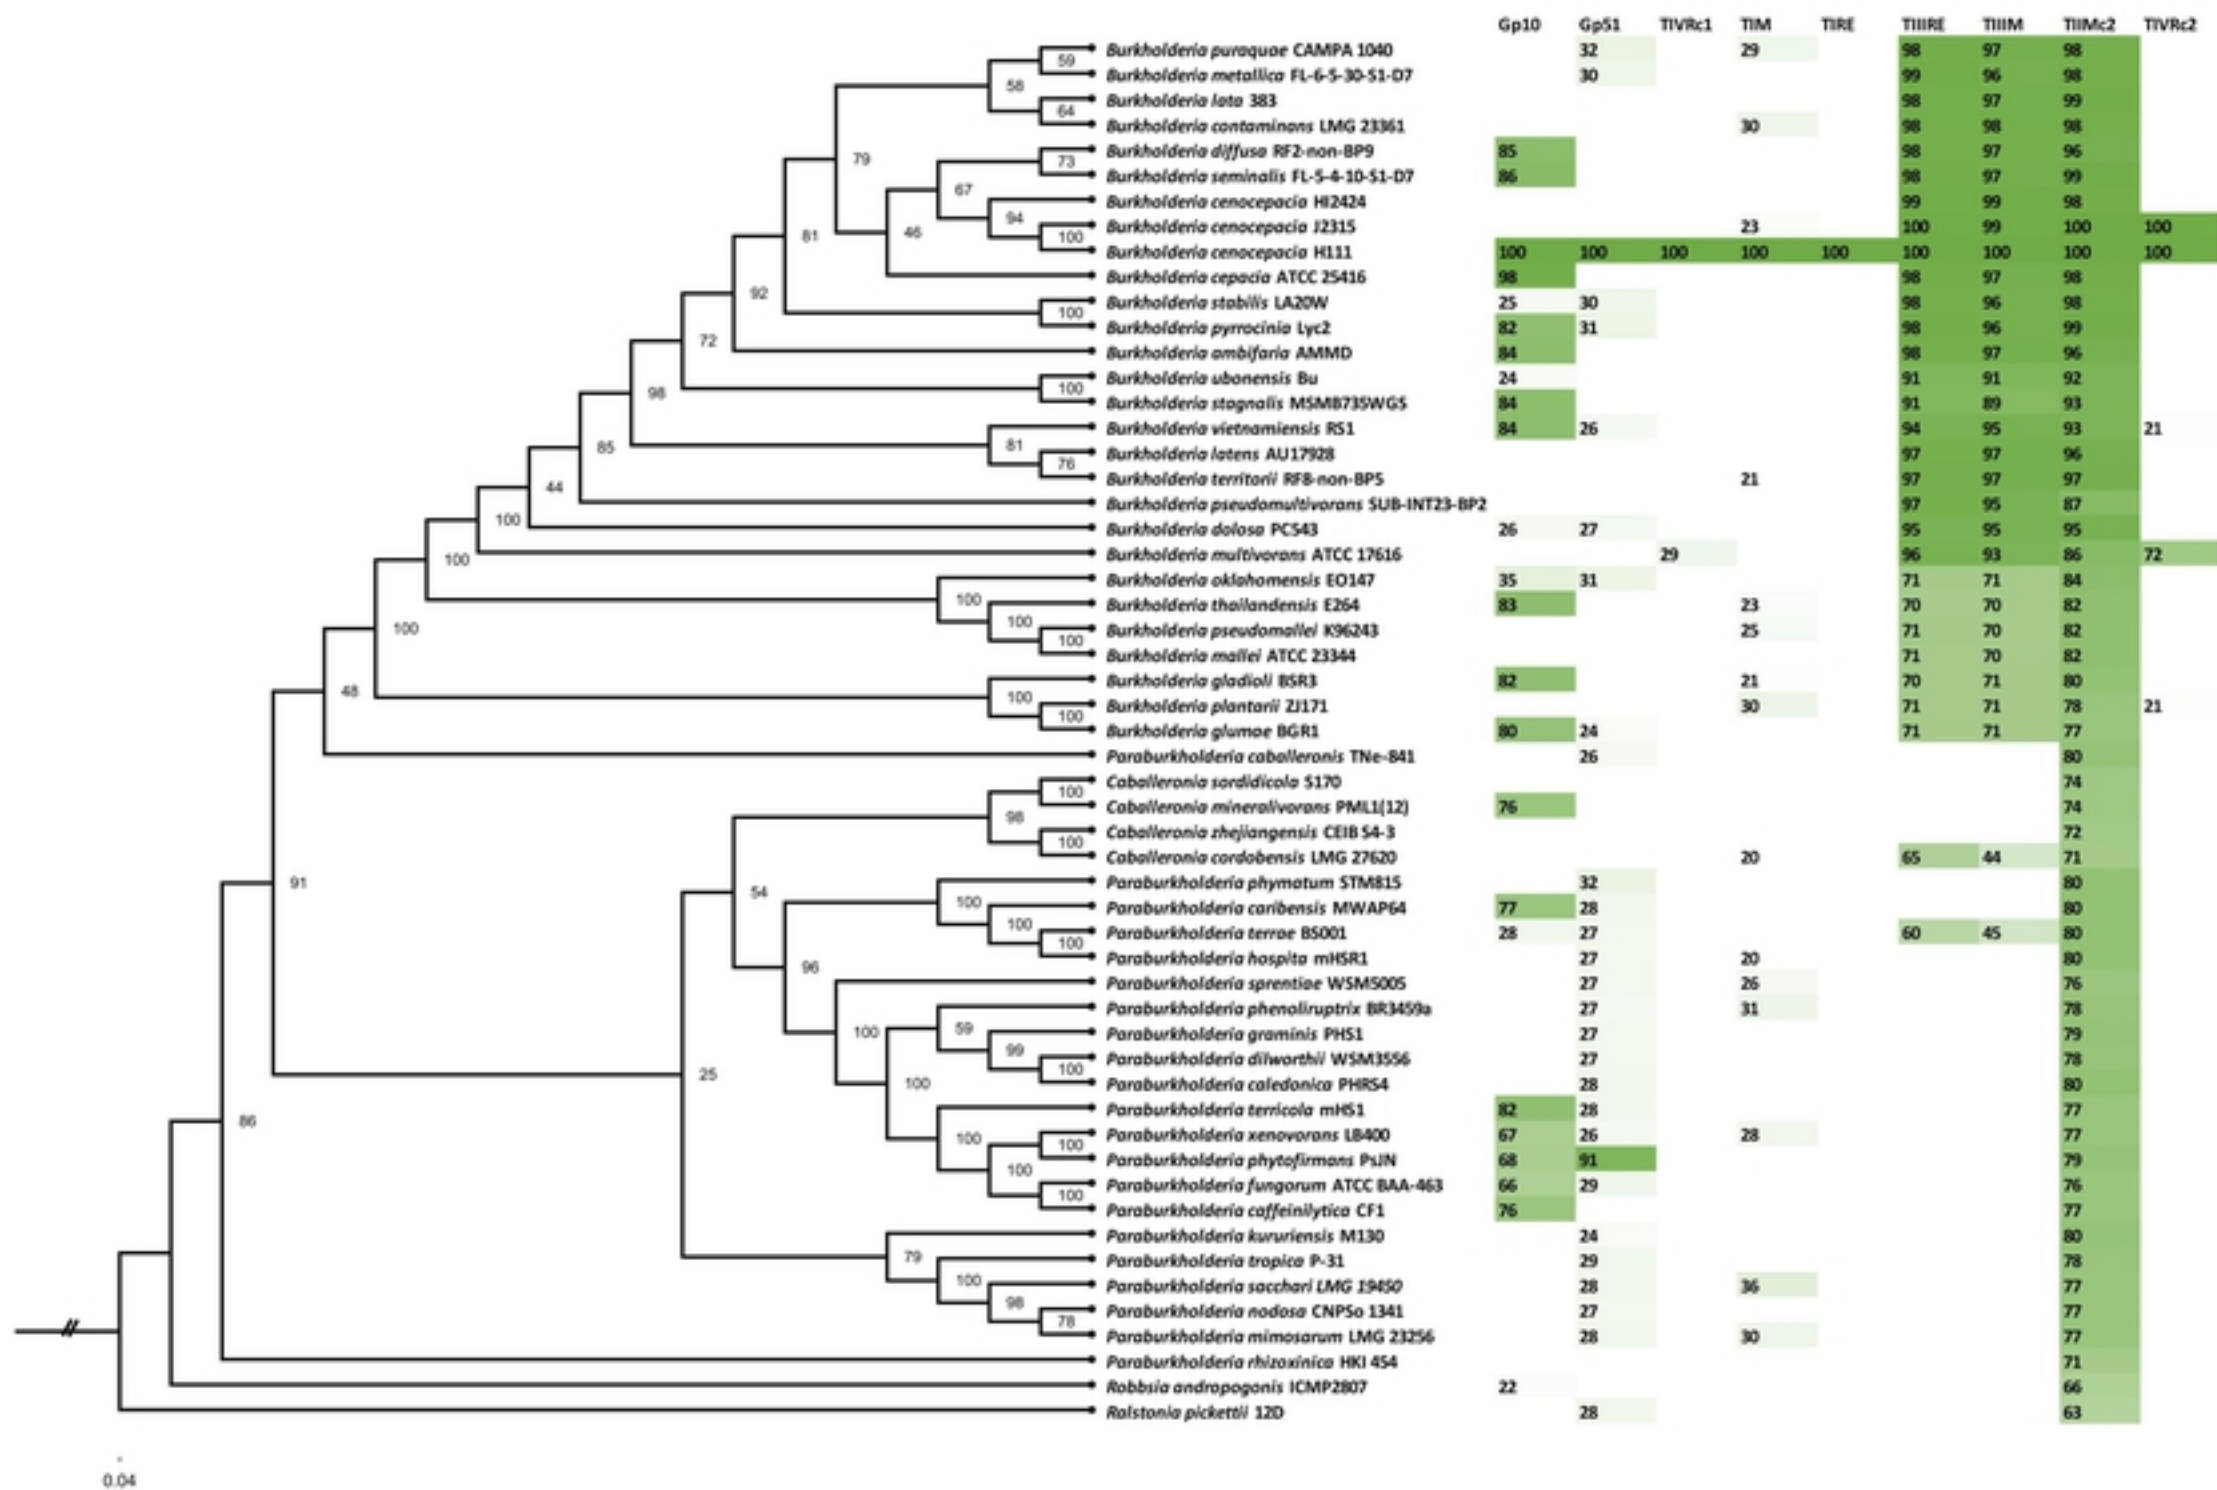

Figure 2. Distribution of homologous of H111 RM components throughout the *Burkholderia sensu lato*.

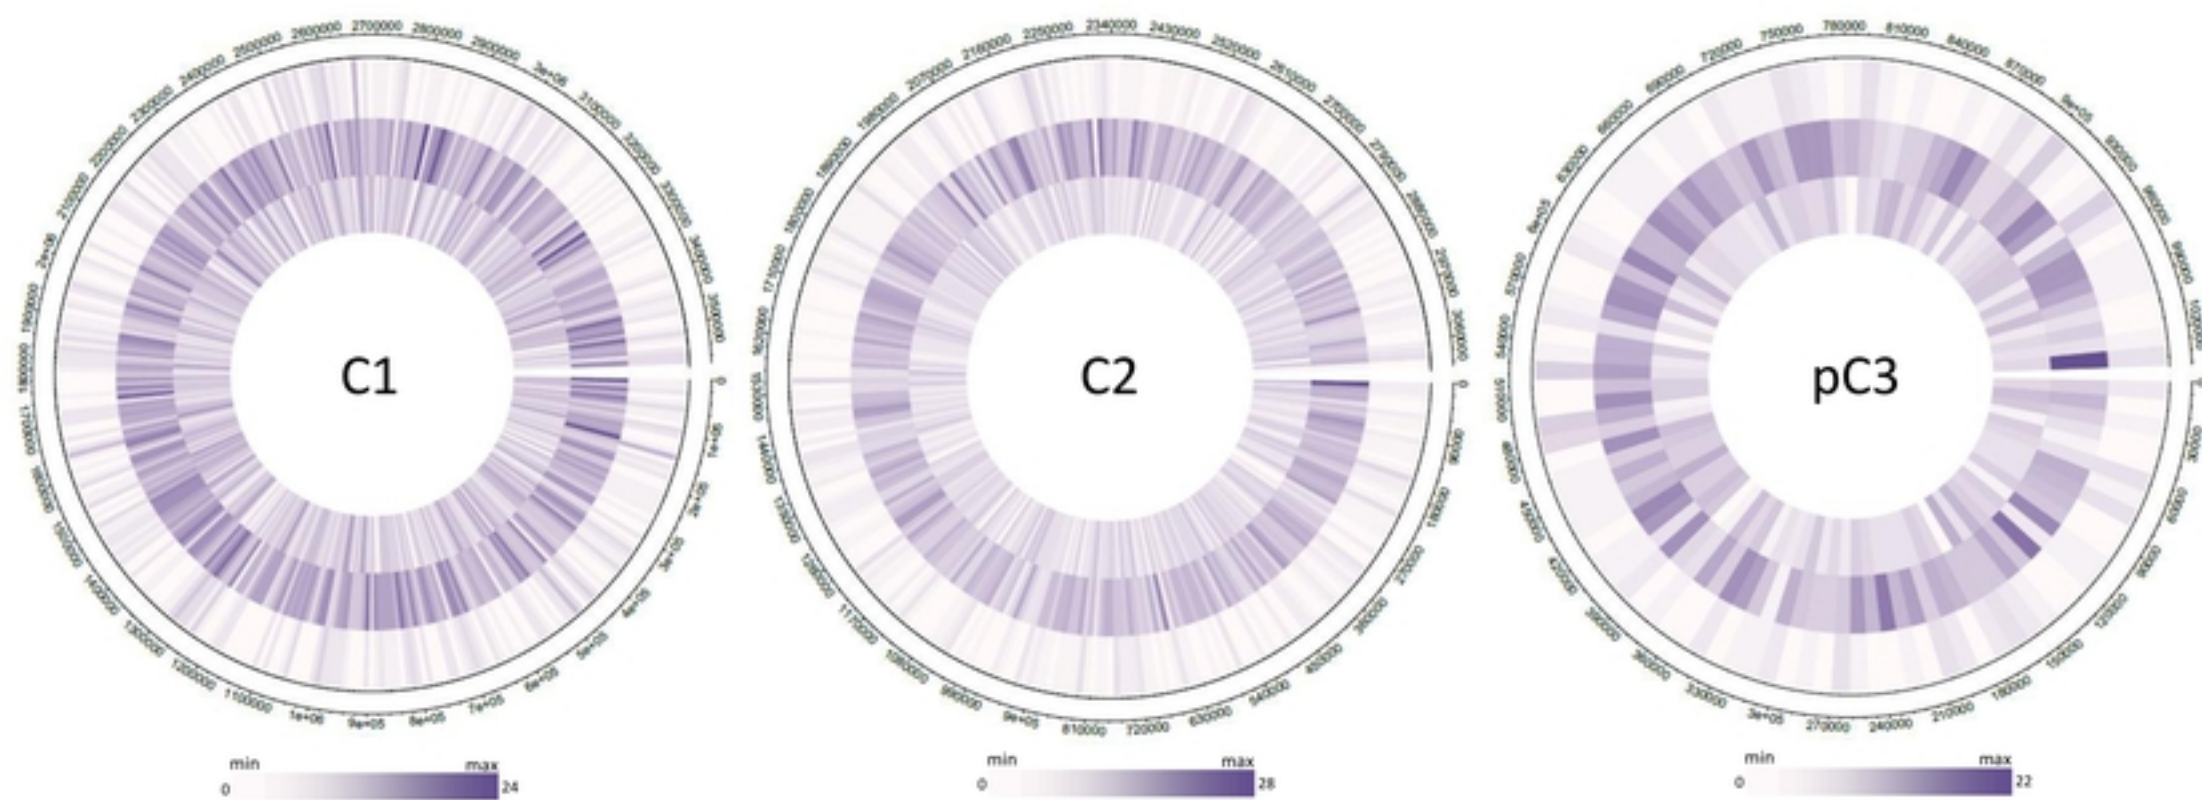

**Figure 3.**



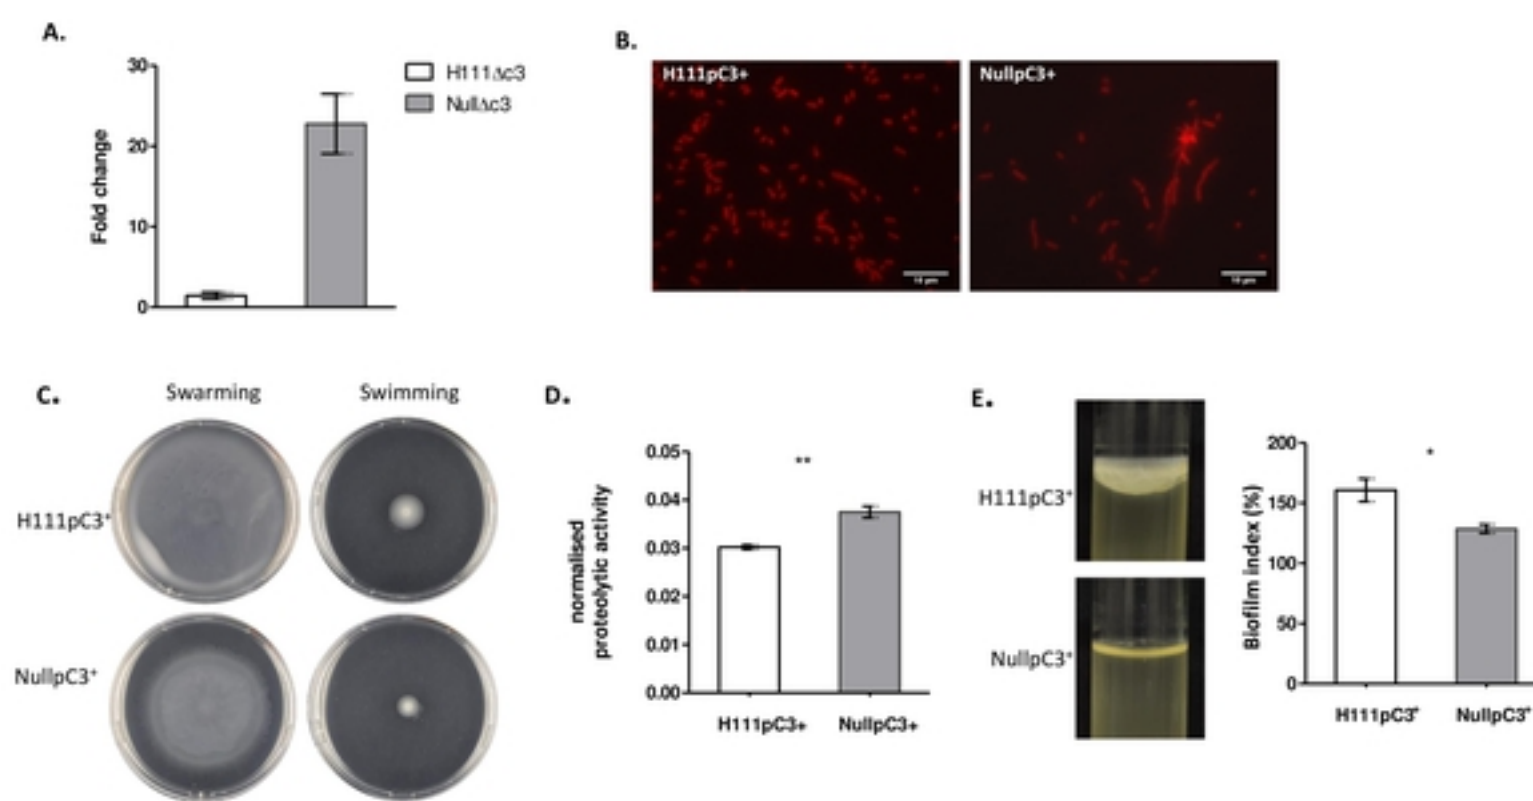

**Figure 4. Phenotypic changes**

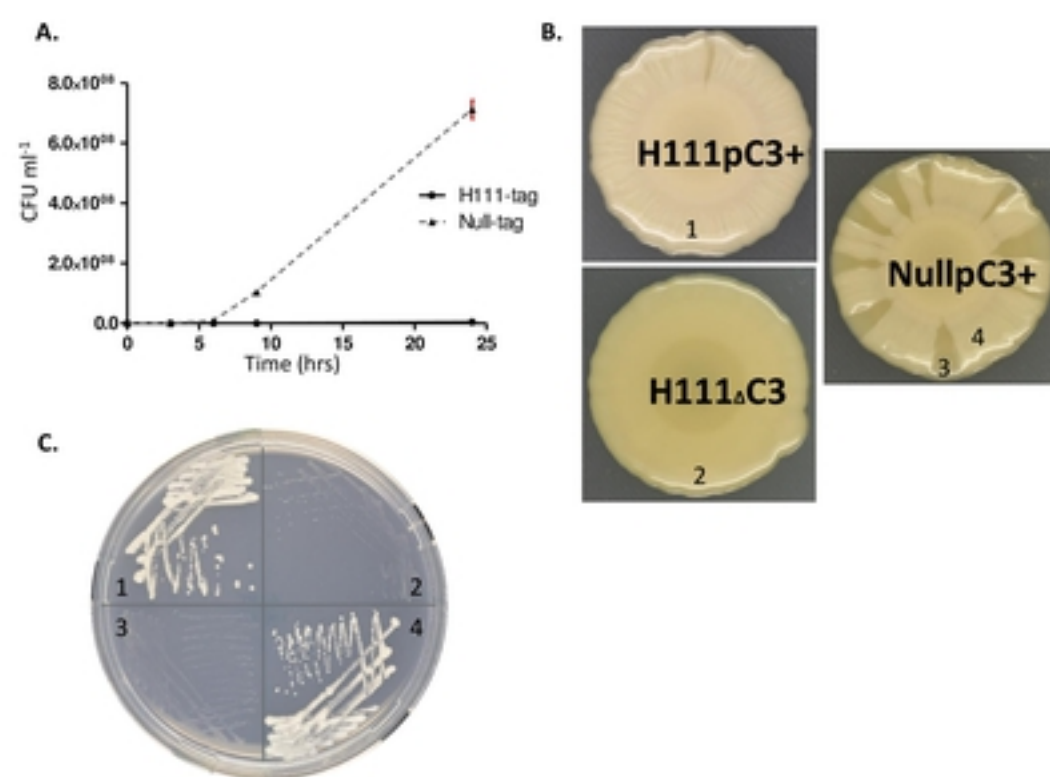

Fig 5

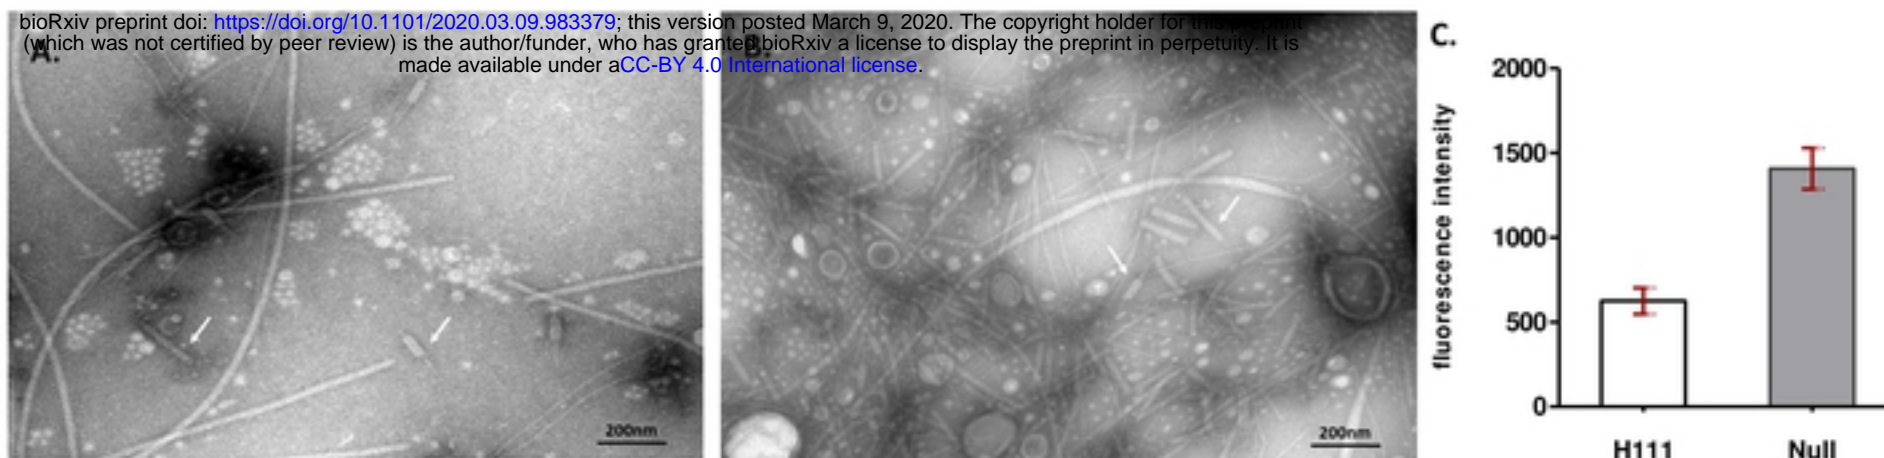

Fig 6

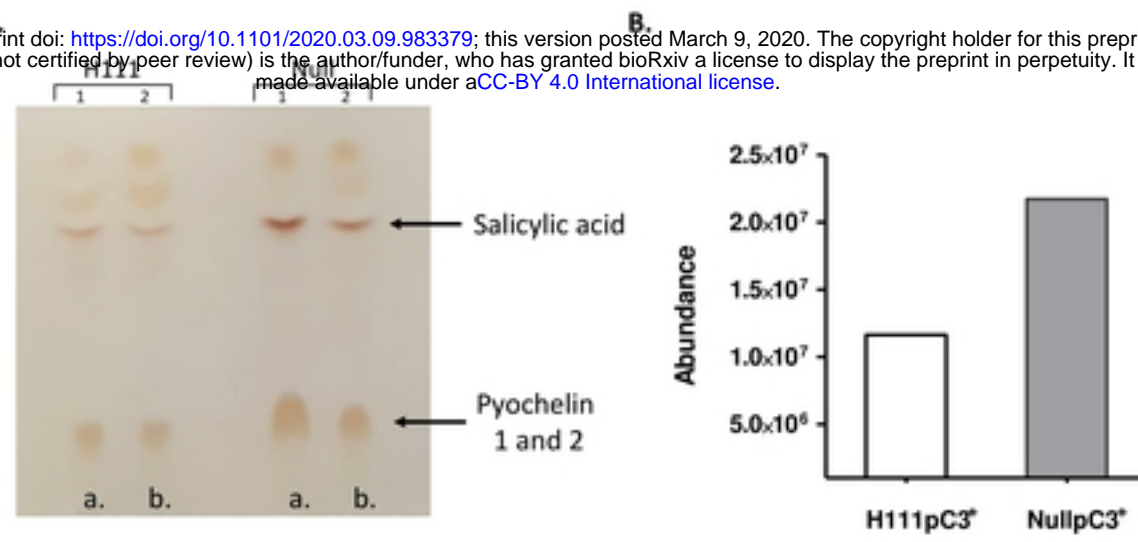

Fig 7
